# Supplementary material for: n-Bu4NI/TBHP-catalyzed direct amination of allylic and benzylic C(sp3)–H with anilines under metal-free conditions
Source: Royal Society of Chemistry journal article supplement (doi:10.1039/c4cc01189a), 2014-01-01
Supplement: c4cc01189a1.pdf [file c4cc01189a1.pdf]

Electronic Supplementary Material (ESI) for Chemical Communications

This journal is © The Royal Society of Chemistry 2014

## *Supporting Information*

### ***n*-Bu<sub>4</sub>NI/TBHP-catalyzed direct amination of allylic and benzylic C(sp<sup>3</sup>)-H with anilines under metal-free conditions**

Xusheng Zhang,<sup>a</sup> Min Wang,<sup>\*a</sup> Pinhua Li,<sup>a</sup> and Lei Wang<sup>\*a,b</sup>

<sup>a</sup> Department of Chemistry, Huaibei Normal University, Huaibei, Anhui 235000, P R China

Tel: + 86-561-3802-069 Fax: + 86-561-3090-518 E-mail: leiwang@chnu.edu.cn

<sup>b</sup> State Key Laboratory of Organometallic Chemistry, Shanghai Institute of Organic Chemistry, Chinese Academy of Sciences, Shanghai 200032, P R China

#### ***Table of Contents for Supporting Information***

|                                                                          |    |
|--------------------------------------------------------------------------|----|
| 1. General considerations.....                                           | 1  |
| 2. Procedures for Catalytic C-H Amination Reactions.....                 | 1  |
| 3. LC-HRMS of TEMPO with allylic radical generated from cyclohexene..... | 2  |
| 4. Characterization data for the products.....                           | 3  |
| 5. <sup>1</sup> H and <sup>13</sup> C NMR spectra of the products.....   | 12 |
| 6. References.....                                                       | 39 |

## 1. General considerations

All  $^1\text{H}$  NMR and  $^{13}\text{C}$  NMR spectra were recorded on a 400 MHz Bruker FT-NMR spectrometers (400 MHz and 100 MHz respectively). All chemical shifts are given as  $\delta$  value (ppm) with reference to tetramethylsilane (TMS) as an internal standard. The peak patterns are indicated as follows: s, singlet; d, doublet; t, triplet; m, multiplet; q, quartet. The coupling constants,  $J$ , are reported in Hertz (Hz). The chemicals and solvents were purchased from commercial suppliers either from Aldrich, USA or Shanghai Chemical Company, China. Products were purified by flash chromatography on 100–200 mesh silica gels,  $\text{SiO}_2$ .

## 2. Procedures for Catalytic C-H Amination Reactions

The Schlenk tube equipped with a stir bar was charged with 4-aminobenzonitrile (0.50 mmol), TBAI (0.10 mmol), cyclohexene (2.0 mL) and TBHP (1.5 mmol) was added by syringe. The reaction mixture was stirred at 90 °C for 10 h. The organic phase was concentrated under reduced pressure to yield the crude product, which was further purified by flash chromatography on silica gel with ethyl acetate-petroleum ether (100:1→9:1) to provide the corresponding product.

### 3. LC-HRMS of TEMPO with allylic radical generated from cyclohexene under the standard reaction conditions

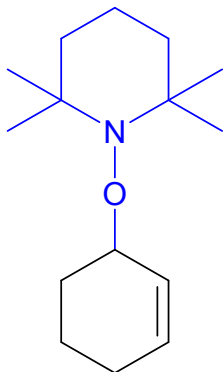

Chemical Formula:  $C_{15}H_{27}NO$

$[M+H] = C_{15}H_{28}NO$   
Exact Mass: 238.2171  
Molecular Weight: 238.3889  
 $m/z$ : 238.2171 (100.0%), 239.2204 (16.2%), 240.2238 (1.2%)  
Elemental Analysis: C, 75.57; H, 11.84; N, 5.88; O, 6.71

Calculated:  $[M+H] = 238.2171$

Found:  $[M+H] = 238.2166$

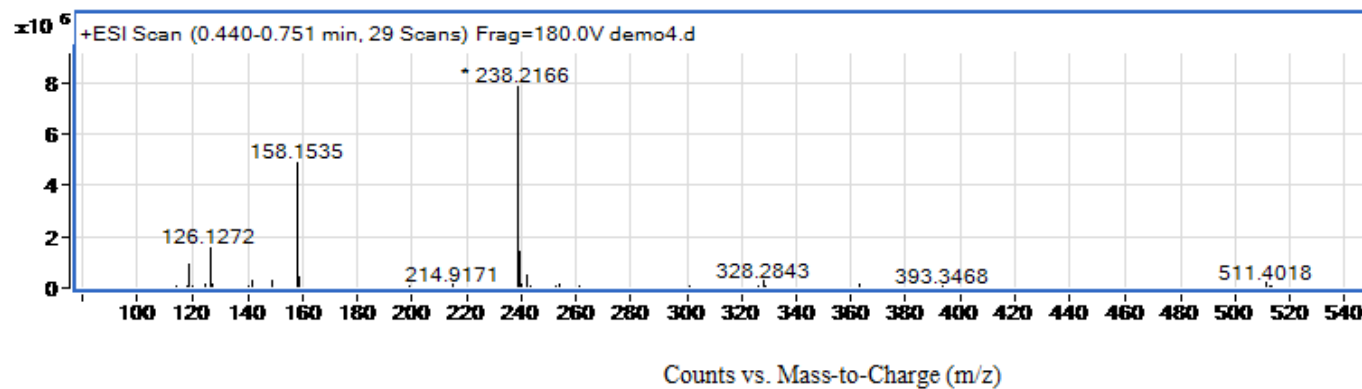

#### 4. Characterization data for the products

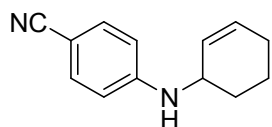

##### 4-(Cyclohex-2-en-1-ylamino)benzonitrile (3a)<sup>[1]</sup>

White solid. <sup>1</sup>H NMR (400 MHz, CDCl<sub>3</sub>) δ: 7.41–7.38 (m, 2H), 6.58–6.55 (m, 2H), 5.93–5.89 (m, 1H), 5.71–5.67 (m, 1H), 4.30–4.28 (m, 1H), 4.02–4.01 (m, 1H), 2.06–2.04 (m, 2H), 1.93–1.87 (m, 1H), 1.73–1.70 (m, 1H), 1.69–1.62 (m, 2H); <sup>13</sup>C NMR (100 MHz, CDCl<sub>3</sub>) δ: 150.37, 133.75, 131.34, 127.04, 120.59, 112.44, 98.19, 47.40, 28.50, 24.96, 19.41.

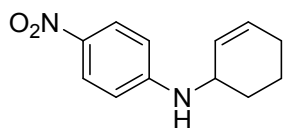

##### N-(Cyclohex-2-en-1-yl)-4-nitroaniline (3b)<sup>[2]</sup>

Yellow solid. <sup>1</sup>H NMR (400 MHz, CDCl<sub>3</sub>) δ: 8.08–8.05 (m, 2H), 6.54–6.53 (m, 2H), 5.93 (s, 1H), 5.69 (s, 1H), 4.59 (s, 1H), 4.07 (s, 1H), 2.06 (s, 2H), 1.93 (s, 1H), 1.67 (s, 3H); <sup>13</sup>C NMR (100 MHz, CDCl<sub>3</sub>) δ: 152.42, 152.40, 131.74, 126.62, 126.53, 111.29, 47.73, 28.53, 24.91, 19.36.

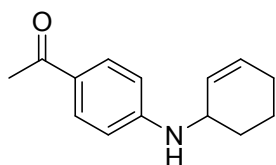

##### 1-(4-(Cyclohex-2-en-1-ylamino)phenyl)ethanone (3c)<sup>[1]</sup>

Yellow solid. <sup>1</sup>H NMR (400 MHz, CDCl<sub>3</sub>) δ: 7.82 (d, *J* = 8.60 Hz, 2H), 6.57 (d, *J* = 8.60 Hz, 2H), 5.92–5.89 (m, 1H), 5.73–5.71 (m, 1H), 4.29–4.28 (s, 1H), 4.07 (s, 1H), 2.50 (s, 3H), 2.05 (s, 2H), 1.95–1.90 (m, 1H), 1.73–1.64 (m, 3H); <sup>13</sup>C NMR (100 MHz, CDCl<sub>3</sub>) δ: 196.19, 151.18, 131.06, 130.89, 127.42, 126.48, 111.67, 47.46, 28.69, 25.95, 25.00, 19.47.

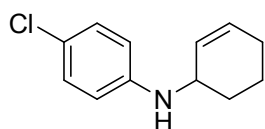

##### 4-Chloro-N-(cyclohex-2-en-1-yl)aniline (3d)<sup>[1]</sup>

Yellow oil.  $^1\text{H}$  NMR (400 MHz,  $\text{CDCl}_3$ )  $\delta$ : 7.12 (d,  $J = 8.72$  Hz, 2H), 6.55 (d,  $J = 8.68$  Hz, 2H), 5.88–5.86 (m, 1H), 5.75–5.72 (m, 1H), 3.95 (s, 1H), 3.65 (s, 1H), 2.05 (s, 2H), 1.93–1.87 (m, 1H), 1.73–1.59 (m, 3H);  $^{13}\text{C}$  NMR (100 MHz,  $\text{CDCl}_3$ )  $\delta$ : 145.76, 130.44, 129.10, 128.14, 121.60, 114.29, 48.08, 28.76, 25.11, 19.61.

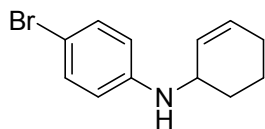

#### 4-Bromo-*N*-(cyclohex-2-en-1-yl)aniline (3e)<sup>[1]</sup>

Yellow soild.  $^1\text{H}$  NMR (400 MHz,  $\text{CDCl}_3$ )  $\delta$ : 7.25 (d,  $J = 8.72$  Hz, 2H), 6.50 (d,  $J = 8.72$  Hz, 2H), 5.88–5.86 (m, 1H), 5.74–5.72 (m, 1H), 3.94 (s, 1H), 3.67 (s, 1H), 2.05 (s, 2H), 1.92–1.89 (m, 1H), 1.71–1.70 (m, 1H), 1.68–1.59 (m, 2H);  $^{13}\text{C}$  NMR (100 MHz,  $\text{CDCl}_3$ )  $\delta$ : 146.17, 131.97, 130.50, 128.06, 114.77, 108.54, 47.96, 28.70, 25.11, 19.59.

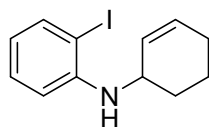

#### *N*-(cyclohex-2-en-1-yl)-2-iodoaniline (3f)

Colorless oil. IR (film,  $\text{cm}^{-1}$ ): 3392 ( $\nu_{\text{N-H}}$ ), 740 ( $\nu_{\text{C=C-H}}$ ).  $^1\text{H}$  NMR (400 MHz,  $\text{CDCl}_3$ )  $\delta$ : 7.69–7.67 (m, 1H), 7.23–7.19 (m, 1H), 6.65–6.63 (m, 1H), 6.46–6.42 (m, 1H), 5.93–5.90 (m, 1H), 5.80–5.77 (m, 1H), 4.19 (s, 1H) 4.04 (s, 1H), 2.14–2.02 (m, 2H), 1.95–1.87 (m, 1H), 1.78–1.65 (m, 3H);  $^{13}\text{C}$  NMR (100 MHz,  $\text{CDCl}_3$ )  $\delta$ : 146.36, 139.26, 130.71, 129.35, 127.89, 118.37, 111.12, 85.90, 48.27, 28.64, 25.14, 19.54.  
HRMS (ESI) ( $[\text{M}+\text{H}]^+$ ) Calcd. For  $\text{C}_{12}\text{H}_{15}\text{IN}$ : 300.0249, Found: 300.0246.

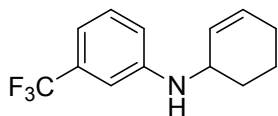

#### 2-(3,4-Dimethylphenyl)-1-methyl-1*H*-indole (3g)<sup>[3]</sup>

Yellow oil.  $^1\text{H}$  NMR (400 MHz,  $\text{CDCl}_3$ )  $\delta$ : 7.27–7.23 (m, 1H), 6.93–6.91 (m, 1H), 6.82 (s, 1H), 6.76–6.74 (m, 1H), 5.91–5.89 (m, 1H), 5.76–5.73 (m, 1H), 4.02 (s, 1H), 3.86 (s, 1H), 2.06 (s, 2H), 1.96–1.91 (m, 1H), 1.78–1.60 (m, 3H);  $^{13}\text{C}$  NMR (100 MHz,  $\text{CDCl}_3$ )  $\delta$ : 147.24, 131.52 (q,  $J = 31.47$  Hz), 130.61,

129.55, 127.71, 124.25 (q,  $J = 270.69$  Hz), 115.94, 113.30 (q,  $J = 3.95$  Hz), 109.09 (q,  $J = 3.91$  Hz), 47.66, 28.58, 24.96, 19.43.

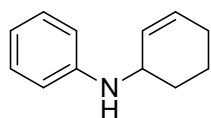

***N*-(Cyclohex-2-en-1-yl)aniline (3h)<sup>[1]</sup>**

Yellow oil. <sup>1</sup>H NMR (400 MHz, CDCl<sub>3</sub>)  $\delta$ : 7.21–7.17 (m, 2H), 6.72–6.68 (m, 1H), 6.65–6.63 (m, 2H), 5.88–5.86 (m, 1H), 5.78–5.76 (m, 1H), 4.01 (s, 1H), 3.65 (s, 1H), 2.05 (s, 2H), 1.96–1.90 (m, 1H), 1.74–1.65 (m, 3H); <sup>13</sup>C NMR (100 MHz, CDCl<sub>3</sub>)  $\delta$ : 147.20, 130.11, 129.31, 128.60, 117.15, 113.25, 47.89, 28.92, 25.17, 19.67.

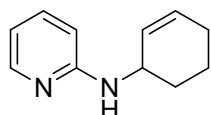

***N*-(Cyclohex-2-en-1-yl)pyridin-2-amine (3i)<sup>[1]</sup>**

Yellow oil. <sup>1</sup>H NMR (400 MHz, CDCl<sub>3</sub>)  $\delta$ : 8.08–8.07 (m, 1H), 7.42–7.38 (m, 1H), 6.56–6.53 (m, 1H), 6.40–6.38 (m, 1H), 5.88–5.86 (m, 1H), 5.75–5.72 (m, 1H), 4.52 (s, 1H), 4.32 (s, 1H), 2.04–1.94 (m, 3H), 1.73–1.60 (m, 3H); <sup>13</sup>C NMR (100 MHz, CDCl<sub>3</sub>)  $\delta$ : 157.83, 148.07, 137.24, 130.22, 128.28, 112.52, 107.00, 46.37, 29.14, 24.93, 19.60.

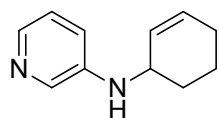

***N*-(Cyclohex-2-en-1-yl)pyridin-3-amine (3j)<sup>[4]</sup>**

Yellow soild. <sup>1</sup>H NMR (400 MHz, CDCl<sub>3</sub>)  $\delta$ : 8.03–8.02 (m, 1H), 7.94–7.93 (m, 1H), 7.09–7.06 (m, 1H), 6.90–6.88 (m, 1H), 5.90–5.88 (m, 1H), 5.74–5.72 (m, 1H), 3.99 (s, 1H), 3.70 (s, 1H), 2.05 (s, 2H), 1.95–1.89 (m, 1H), 1.77–1.59 (m, 3H); <sup>13</sup>C NMR (100 MHz, CDCl<sub>3</sub>)  $\delta$ : 143.17, 138.51, 136.47, 130.80, 127.77, 123.73, 118.87, 47.66, 28.66, 25.05, 19.50.

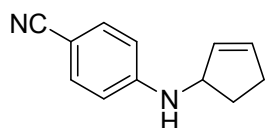

#### 4-(Cyclopent-2-en-1-ylamino)benzonitrile (3k)

Yellow oil. IR (film,  $\text{cm}^{-1}$ ): 3567 ( $\nu_{\text{N-H}}$ ), 2211 ( $\nu_{\text{C}\equiv\text{N}}$ ), 741 ( $\nu_{\text{C}=\text{C-H}}$ ).  $^1\text{H}$  NMR (400 MHz,  $\text{CDCl}_3$ )  $\delta$ : 7.40 (d,  $J = 8.32$  Hz, 2H), 6.57 (d,  $J = 8.36$  Hz, 2H), 6.03 (s, 1H), 5.80–5.79 (m, 1H), 4.55 (s, 1H), 4.33 (s, 1H), 2.53–2.45 (m, 1H), 2.39–2.30 (m, 2H) 1.71–1.62 (m, 1H);  $^{13}\text{C}$  NMR (100 MHz,  $\text{CDCl}_3$ )  $\delta$ : 150.64, 135.35, 133.59, 130.38, 120.51, 112.43, 98.12, 58.71, 31.10, 30.90. HRMS (ESI) ( $[\text{M}+\text{H}]^+$ ) Calcd. For  $\text{C}_{12}\text{H}_{13}\text{N}_2$ : 185.1079, Found: 185.1084.

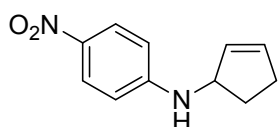

#### *N*-(Cyclopent-2-en-1-yl)-4-nitroaniline (3l)<sup>[5]</sup>

Yellow solid.  $^1\text{H}$  NMR (400 MHz,  $\text{CDCl}_3$ )  $\delta$ : 8.06 (d,  $J = 9.00$  Hz, 2H), 6.54 (d,  $J = 9.04$  Hz, 2H), 6.06–6.05 (m, 1H), 5.80–5.79 (m, 1H), 4.65 (s, 1H), 4.62–4.61 (m, 1H), 2.55–2.47 (m, 1H), 2.43–2.34 (m, 2H), 1.73–1.66 (m, 1H);  $^{13}\text{C}$  NMR (100 MHz,  $\text{CDCl}_3$ )  $\delta$ : 152.66, 137.56, 135.77, 130.00, 126.36, 111.27, 58.97, 31.13, 30.93.

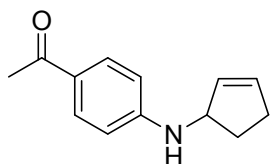

#### 1-(4-(Cyclopent-2-en-1-ylamino)phenyl)ethanone (3m)

Yellow solid. m.p. 86–87 °C. IR (KBr,  $\text{cm}^{-1}$ ): 3654 ( $\nu_{\text{N-H}}$ ), 1646 ( $\nu_{\text{C}=\text{O}}$ ), 733 ( $\nu_{\text{C}=\text{C-H}}$ ).  $^1\text{H}$  NMR (400 MHz,  $\text{CDCl}_3$ )  $\delta$ : 7.82 (d,  $J = 8.56$  Hz, 2H), 6.58 (d,  $J = 8.56$  Hz, 2H), 6.03–6.02 (m, 1H), 5.82–5.81 (m, 1H), 4.61 (s, 1H), 4.30 (s, 1H), 2.50 (s, 4H), 2.39–2.36 (m, 2H) 1.71–1.64 (m, 1H);  $^{13}\text{C}$  NMR (100 MHz,  $\text{CDCl}_3$ )  $\delta$ : 196.18, 151.46, 135.06, 130.73, 126.38, 111.66, 58.79, 31.09, 31.05, 25.86. HRMS (ESI) ( $[\text{M}+\text{H}]^+$ ) Calcd. For  $\text{C}_{13}\text{H}_{15}\text{NO}$ : 202.1232 Found: 202.1227.

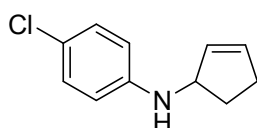

#### 4-Chloro-*N*-(cyclopent-2-en-1-yl)aniline (3n)

Yellow oil. IR (film,  $\text{cm}^{-1}$ ): 3420 ( $\nu_{\text{N-H}}$ ), 736 ( $\nu_{\text{C=C-H}}$ ).  $^1\text{H}$  NMR (400 MHz,  $\text{CDCl}_3$ )  $\delta$ : 7.12 (d,  $J = 8.60$  Hz, 2H), 6.56 (d,  $J = 8.60$  Hz, 2H), 6.00–5.99 (m, 1H), 5.83–5.82 (m, 1H), 4.51 (s, 1H), 3.69 (s, 1H), 2.52–2.45 (m, 1H), 2.40–2.29 (m, 2H), 1.70–1.61 (m, 1H);  $^{13}\text{C}$  NMR (100 MHz,  $\text{CDCl}_3$ )  $\delta$ : 146.12, 134.41, 131.36, 128.96, 121.62, 114.24, 59.45, 31.04, 30.95. HRMS (ESI) ( $[\text{M}+\text{H}]^+$ ) Calcd. For  $\text{C}_{11}\text{H}_{13}\text{ClN}$ : 194.0737, Found: 194.0737.

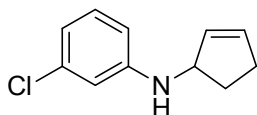

### 3-Chloro-*N*-(cyclopent-2-en-1-yl)aniline (3o)

Yellow oil. IR (film,  $\text{cm}^{-1}$ ): 3411 ( $\nu_{\text{N-H}}$ ), 726 ( $\nu_{\text{C=C-H}}$ ).  $^1\text{H}$  NMR (400 MHz,  $\text{CDCl}_3$ )  $\delta$ : 7.10–7.06 (m, 1H), 6.68–6.66 (m, 1H), 6.62 (s, 1H), 6.51–6.49 (m, 1H), 6.02–6.01 (m, 1H), 5.84–5.83 (m, 1H), 4.53–4.52 (m, 1H), 3.76 (s, 1H), 2.54–2.46 (m, 1H), 2.41–2.33 (m, 2H), 1.69–1.64 (m, 1H);  $^{13}\text{C}$  NMR (100 MHz,  $\text{CDCl}_3$ )  $\delta$ : 148.71, 134.90, 134.54, 131.25, 130.09, 116.86, 112.68, 111.49, 59.20, 31.07, 31.03. HRMS (ESI) ( $[\text{M}+\text{H}]^+$ ) Calcd. For  $\text{C}_{11}\text{H}_{13}\text{ClN}$ : 194.0737, Found: 194.0730.

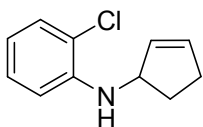

### 2-Chloro-*N*-(cyclopent-2-en-1-yl)aniline (3p)

Yellow oil. IR (film,  $\text{cm}^{-1}$ ): 3420 ( $\nu_{\text{N-H}}$ ), 740 ( $\nu_{\text{C=C-H}}$ ).  $^1\text{H}$  NMR (400 MHz,  $\text{CDCl}_3$ )  $\delta$ : 7.30–7.28 (m, 1H), 7.20–7.16 (m, 1H), 6.79–6.77 (m, 1H), 6.68–6.64 (m, 1H), 6.05 (s, 1H), 5.90 (s, 1H), 4.61 (s, 1H), 4.34 (s, 1H), 2.59–2.51 (m, 1H), 2.44–2.40 (m, 2H), 1.76–1.70 (m, 1H);  $^{13}\text{C}$  NMR (100 MHz,  $\text{CDCl}_3$ )  $\delta$ : 143.43, 134.66, 131.22, 129.12, 127.67, 119.09, 116.88, 111.78, 59.11, 31.18, 31.14. HRMS (ESI) ( $[\text{M}+\text{H}]^+$ ) Calcd. For  $\text{C}_{11}\text{H}_{13}\text{ClN}$ : 194.0737, Found: 194.0735.

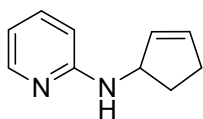

### *N*-(Cyclopent-2-en-1-yl)pyridin-2-amine (3q)



Yellow soild. m.p. 79–80 °C. IR (KBr,  $\text{cm}^{-1}$ ): 3247 ( $\nu_{\text{N-H}}$ ), 735 ( $\nu_{\text{C-H}}$ ).  $^1\text{H}$  NMR (400 MHz,  $\text{CDCl}_3$ )  $\delta$ : 8.07 (d,  $J = 4.56$  Hz, 1H), 7.42–7.38 (m, 2H), 6.57–6.53 (m, 1H), 6.41–6.39 (m, 1H), 5.97–5.96 (m, 1H), 5.82–5.81 (m, 1H), 4.80 (s, 1H), 4.63 (s, 1H), 2.50–2.45 (m, 1H), 2.41–2.30 (m, 2H), 1.68–1.62 (m, 1H);  $^{13}\text{C}$  NMR (100 MHz,  $\text{CDCl}_3$ )  $\delta$ : 158.23, 148.15, 137.24, 134.13, 131.62, 112.57, 106.78, 57.75, 31.39, 31.00. HRMS (ESI) ( $[\text{M}+\text{H}]^+$ ) Calcd. For  $\text{C}_{10}\text{H}_{13}\text{N}_2$ : 161.1079, Found: 161.1076.

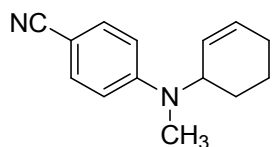

#### 4-(Cyclohex-2-en-1-yl(methyl)amino)benzonitrile (3r)<sup>[1]</sup>

Pale yellow oil.  $^1\text{H}$  NMR (400 MHz,  $\text{CDCl}_3$ )  $\delta$ : 7.45 (d,  $J = 8.64$  Hz, 2H), 6.71 (d,  $J = 8.64$  Hz, 2H), 5.99–5.97 (m, 1H), 5.58–5.55 (m, 1H), 4.48 (s, 1H), 2.85 (s, 3H), 2.07 (s, 2H), 1.91–1.82 (m, 2H), 1.73–1.55 (m, 2H);  $^{13}\text{C}$  NMR (100 MHz,  $\text{CDCl}_3$ )  $\delta$ : 151.94, 133.35, 131.64, 128.12, 120.60, 111.62, 97.03, 54.39, 32.44, 25.74, 24.58, 21.09.

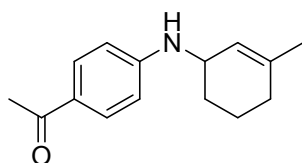

#### 1-(4-((3-Methylcyclohex-2-en-1-yl)amino)phenyl)ethanone (3s)

Yellow soild. m.p. 101–102 °C. IR (KBr,  $\text{cm}^{-1}$ ): 3363 ( $\nu_{\text{N-H}}$ ), 1645 ( $\nu_{\text{C=O}}$ ), 730 ( $\nu_{\text{C-H}}$ ).  $^1\text{H}$  NMR (400 MHz,  $\text{CDCl}_3$ )  $\delta$ : 7.81 (d,  $J = 8.52$  Hz, 2H), 6.56 (d,  $J = 8.52$  Hz, 2H), 5.45 (s, 1H), 4.28 (d,  $J = 6.60$  Hz, 1H), 4.04 (s, 1H), 2.49 (s, 3H), 2.08–1.62 (m, 9H);  $^{13}\text{C}$  NMR (100 MHz,  $\text{CDCl}_3$ )  $\delta$ : 196.02, 151.21, 138.69, 130.77, 126.21, 121.60, 111.52, 47.79, 29.86, 28.24, 25.79, 23.56, 19.55. HRMS (ESI) ( $[\text{M}+\text{H}]^+$ ) Calcd. For  $\text{C}_{15}\text{H}_{20}\text{NO}$ : 230.1545, Found: 230.1539.

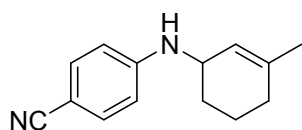

#### 4-((3-Methylcyclohex-2-en-1-yl)amino)benzonitrile (3t)

Yellow oil. IR (film,  $\text{cm}^{-1}$ ): 3358 ( $\nu_{\text{N-H}}$ ), 2208 ( $\nu_{\text{C}\equiv\text{N}}$ ), 731 ( $\nu_{\text{C-H}}$ ).  $^1\text{H}$  NMR (400 MHz,  $\text{CDCl}_3$ )  $\delta$ : 7.38 (d,  $J = 8.68$  Hz, 2H), 6.55 (d,  $J = 8.64$  Hz, 2H), 5.42 (s, 1H), 4.27 (d,  $J = 7.32$  Hz, 1H), 3.98 (s, 1H), 2.08–

1.54 (m, 9H);  $^{13}\text{C}$  NMR (100 MHz,  $\text{CDCl}_3$ )  $\delta$ : 150.37, 138.99, 133.59, 121.23, 120.49, 112.30, 97.90, 47.76, 29.82, 28.06, 23.56, 19.49. HRMS (ESI) ( $[\text{M}+\text{H}]^+$ ) Calcd. For  $\text{C}_{14}\text{H}_{17}\text{N}_2$ : 212.1392, Found: 212.1396.

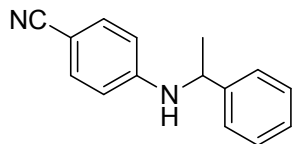

#### 4-((1-Phenylethyl)amino)benzonitrile (4a)<sup>[6]</sup>

Yellow solid.  $^1\text{H}$  NMR (400 MHz,  $\text{CDCl}_3$ )  $\delta$ : 7.36–7.24 (m, 7H), 6.46 (d,  $J = 7.60$  Hz, 2H), 4.68 (s, 1H), 4.52 (q,  $J = 6.40$  Hz, 2H), 1.53 (d,  $J = 6.40$  Hz, 3H);  $^{13}\text{C}$  NMR (100 MHz,  $\text{CDCl}_3$ )  $\delta$ : 150.18, 143.52, 133.44, 128.78, 127.26, 125.52, 120.22, 112.81, 98.83, 52.99, 24.53.

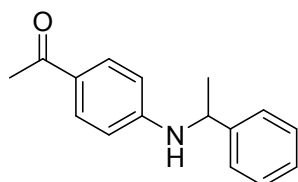

#### 1-(4-((1-Phenylethyl)amino)phenyl)ethanone (4b)<sup>[6]</sup>

Yellow oil.  $^1\text{H}$  NMR (400 MHz,  $\text{CDCl}_3$ )  $\delta$ : 7.74 (d,  $J = 7.64$  Hz, 2H), 7.34–7.24 (m, 5H), 6.48 (d,  $J = 7.68$  Hz, 2H), 4.59–4.58 (m, 2H), 2.45 (s, 3H), 1.56 (d,  $J = 5.68$  Hz, 3H);  $^{13}\text{C}$  NMR (100 MHz,  $\text{CDCl}_3$ )  $\delta$ : 196.27, 151.09, 144.03, 130.61, 128.81, 127.22, 126.85, 125.68, 112.13, 53.06, 25.91, 24.63.

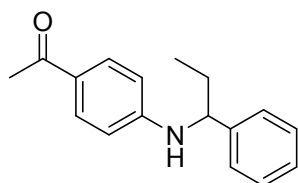

#### 1-(4-((1-Phenylpropyl)amino)phenyl)ethanone (4c)

Yellow solid. m.p. 83–84 °C. IR (KBr,  $\text{cm}^{-1}$ ): 3309 ( $\nu_{\text{N-H}}$ ), 1650 ( $\nu_{\text{C=O}}$ ).  $^1\text{H}$  NMR (400 MHz,  $\text{CDCl}_3$ )  $\delta$ : 7.74 (d,  $J = 8.40$  Hz, 2H), 7.36–7.30 (m, 4H), 7.27–7.25 (m, 1H), 6.50 (d,  $J = 8.40$  Hz, 2H), 4.62 (s, 1H), 4.34–4.31 (m, 1H), 2.45 (s, 3H), 1.92–1.83 (m, 2H), 0.99 (t,  $J = 7.36$  Hz, 3H);  $^{13}\text{C}$  NMR (100 MHz,  $\text{CDCl}_3$ )  $\delta$ : 196.11, 151.26, 142.61, 130.50, 128.56, 127.13, 126.22, 112.00, 59.18, 31.25, 25.78, 10.59. HRMS (ESI) ( $[\text{M}+\text{H}]^+$ ) Calcd. For  $\text{C}_{17}\text{H}_{20}\text{NO}$ : 254.1545, Found: 254.1542.

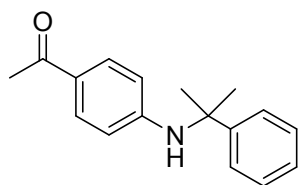

**1-(4-((2-Phenylpropan-2-yl)amino)phenyl)ethanone (4d)**

Yellow solid. m.p. 73–74 °C. IR (KBr,  $\text{cm}^{-1}$ ): 3359 ( $\nu_{\text{N-H}}$ ), 1654 ( $\nu_{\text{C=O}}$ ).  $^1\text{H}$  NMR (400 MHz,  $\text{CDCl}_3$ )  $\delta$ : 7.67 (d,  $J = 8.04$  Hz, 2H), 7.47–7.45 (m, 2H), 7.37–7.33 (m, 2H), 7.27–7.26 (m, 1H), 6.31 (d,  $J = 8.08$  Hz, 2H), 4.72 (s, 1H), 2.43 (s, 3H), 1.70 (s, 6H);  $^{13}\text{C}$  NMR (100 MHz,  $\text{CDCl}_3$ )  $\delta$ : 196.18, 150.14, 146.12, 130.04, 128.63, 126.59, 126.33, 125.22, 113.71, 56.02, 30.46, 25.75. HRMS (ESI) ( $[\text{M}+\text{H}]^+$ ) Calcd. For  $\text{C}_{17}\text{H}_{20}\text{NO}$ : 254.1545, Found: 254.1543.

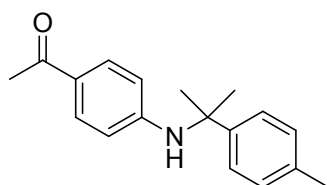

**1-(4-((2-(*p*-Tolyl)propan-2-yl)amino)phenyl)ethanone (4e)**

Yellow oil. IR (film,  $\text{cm}^{-1}$ ): 3341 ( $\nu_{\text{N-H}}$ ), 1653 ( $\nu_{\text{C=O}}$ ).  $^1\text{H}$  NMR (400 MHz,  $\text{CDCl}_3$ )  $\delta$ : 7.67 (d,  $J = 8.04$  Hz, 2H), 7.35–7.33 (m, 2H), 7.17–7.15 (m, 2H), 6.33 (d,  $J = 8.00$  Hz, 2H), 4.79 (s, 1H), 2.43 (s, 3H), 2.35 (s, 3H), 1.68 (s, 6H), 0.99 (t,  $J = 7.36$  Hz, 3H);  $^{13}\text{C}$  NMR (100 MHz,  $\text{CDCl}_3$ )  $\delta$ : 196.19, 150.34, 143.20, 136.14, 130.07, 129.35, 126.24, 125.19, 113.74, 55.86, 30.52, 25.77, 20.85. HRMS (ESI) ( $[\text{M}+\text{H}]^+$ ) Calcd. For  $\text{C}_{18}\text{H}_{22}\text{NO}$ : 268.1701, Found: 268.1696.

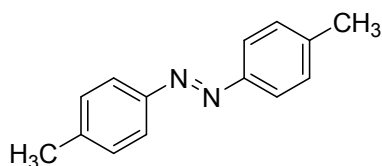

**(*E*)-1,2-Bis(4-methylphenyl)diazene<sup>[7]</sup>**

Yellow solid.  $^1\text{H}$  NMR (400 MHz,  $\text{CDCl}_3$ )  $\delta$ : 7.85 (d,  $J = 8.0$  Hz, 4H), 7.33 (d,  $J = 8.0$  Hz, 4H), 2.46 (s, 6H);  $^{13}\text{C}$  NMR (100 MHz,  $\text{CDCl}_3$ )  $\delta$ : 150.76, 141.07, 129.60, 122.63, 21.36.

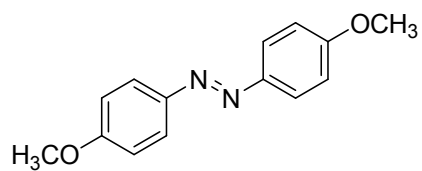

**(*E*)-1,2-Bis(4-methoxyphenyl)diazene**<sup>[7]</sup>

Yellow solid. <sup>1</sup>H NMR (400 MHz, CDCl<sub>3</sub>) δ: 7.89 (d, *J* = 8.8 Hz, 4H), 7.02 (d, *J* = 8.8 Hz, 4H), 3.90 (s, 6H); <sup>13</sup>C NMR (100 MHz, CDCl<sub>3</sub>) δ: 161.46, 147.00, 124.22, 114.05, 55.43.

## 5. $^1\text{H}$ and $^{13}\text{C}$ spectra of the products

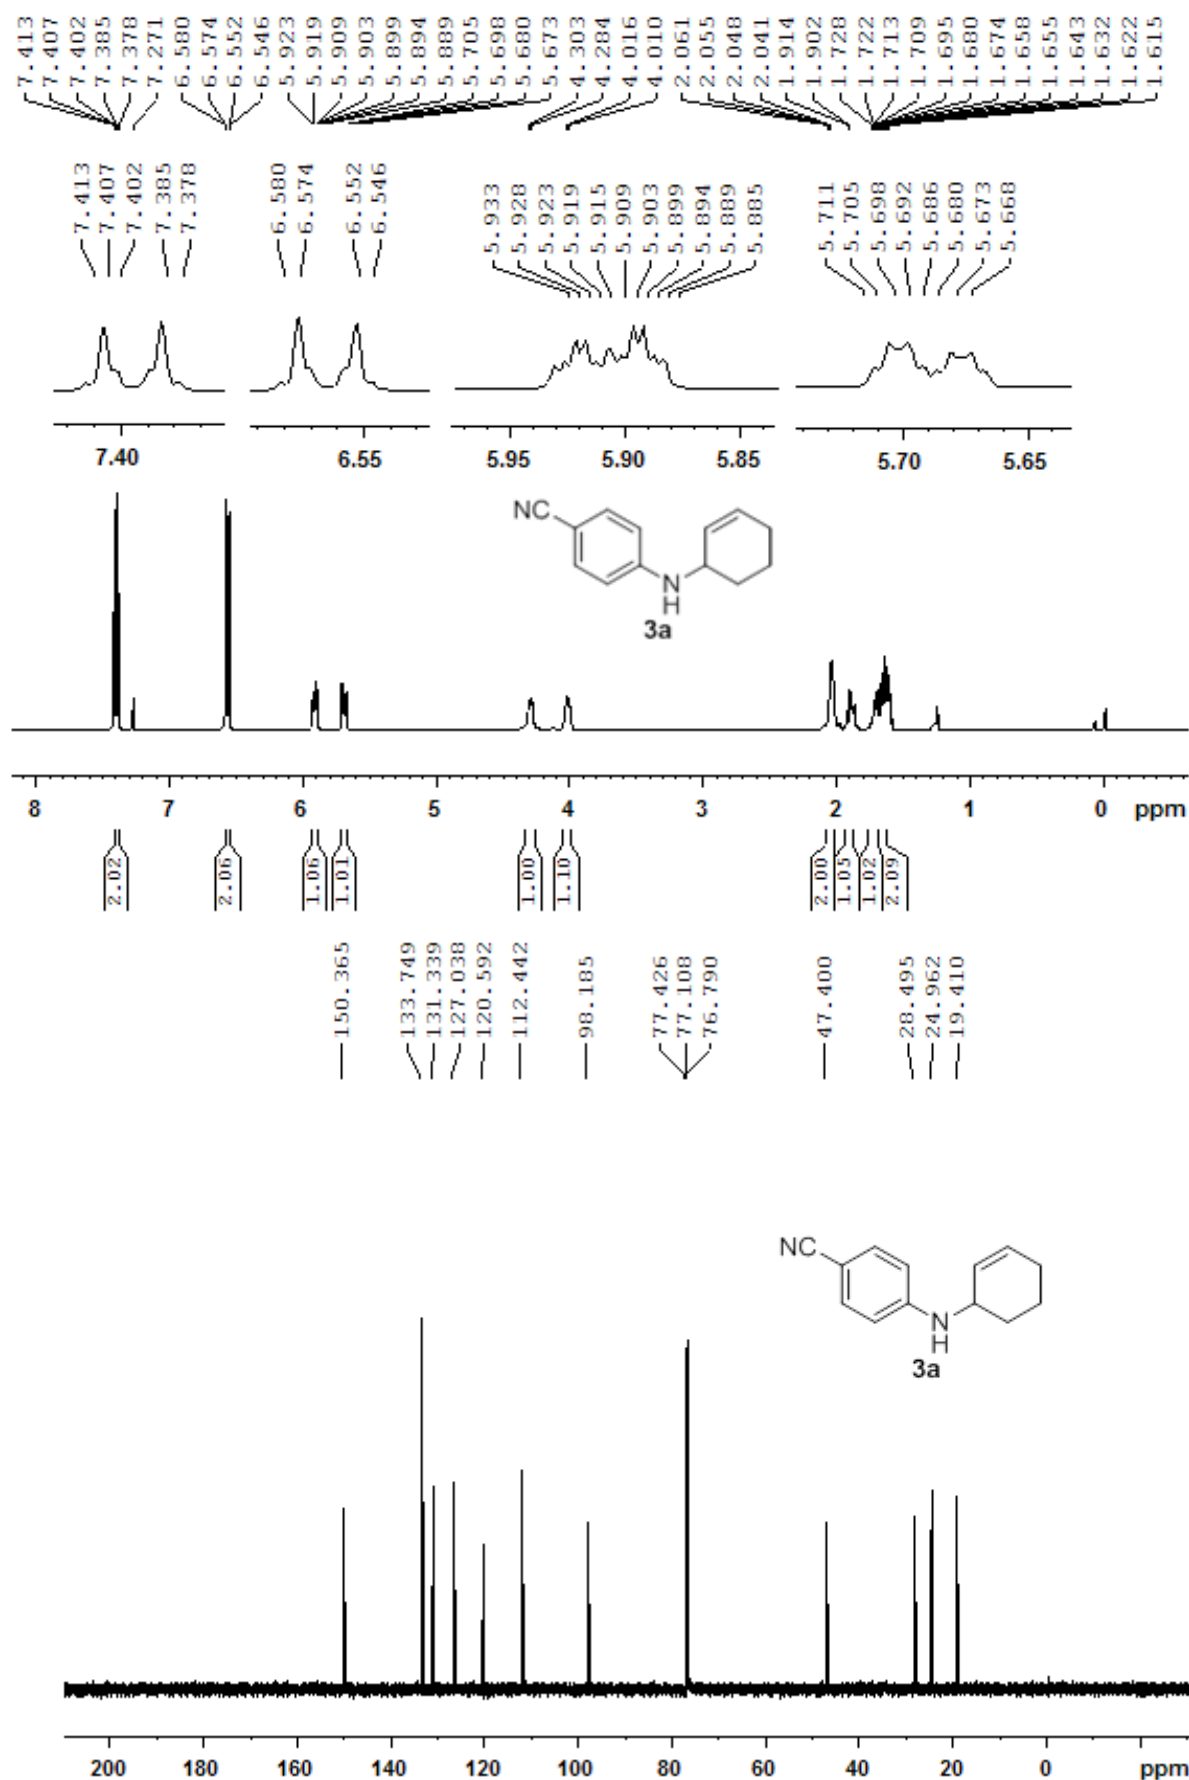

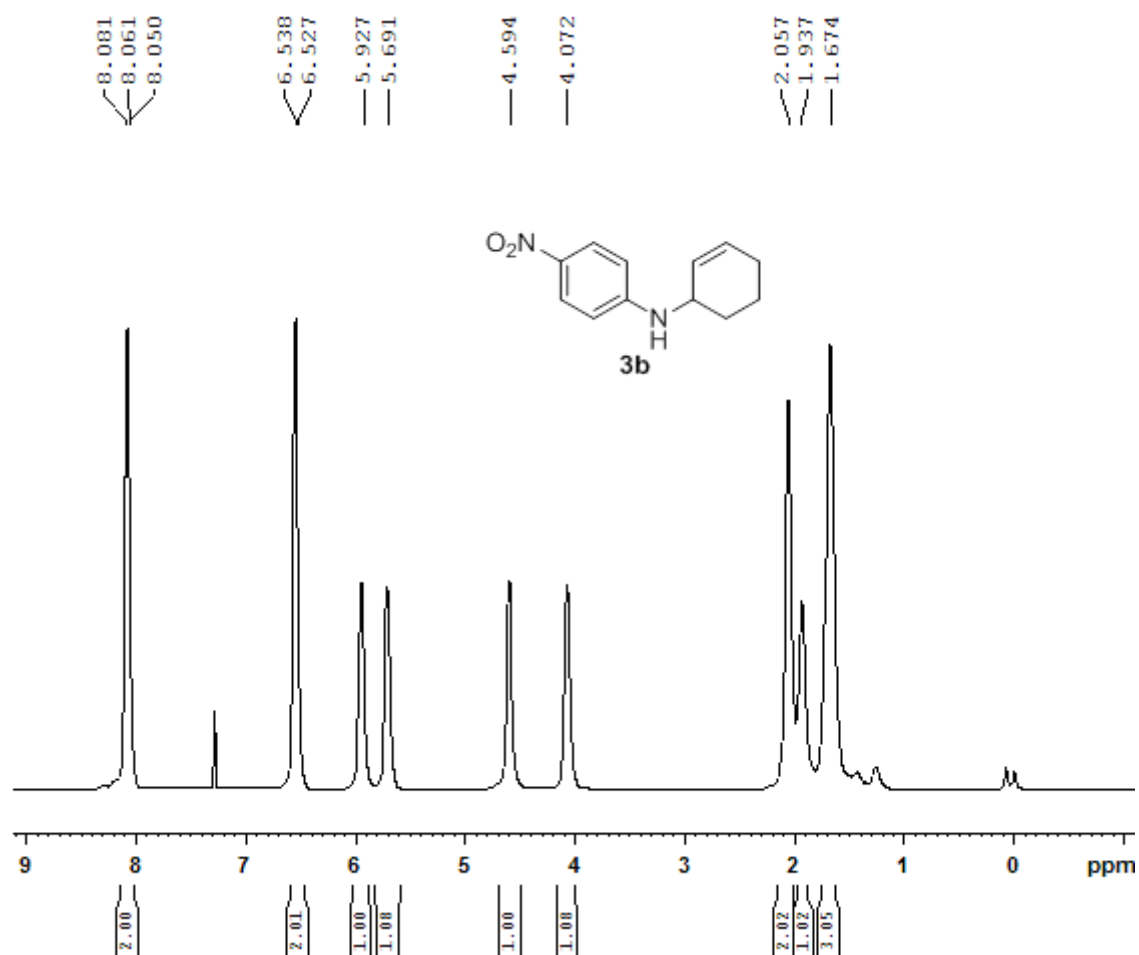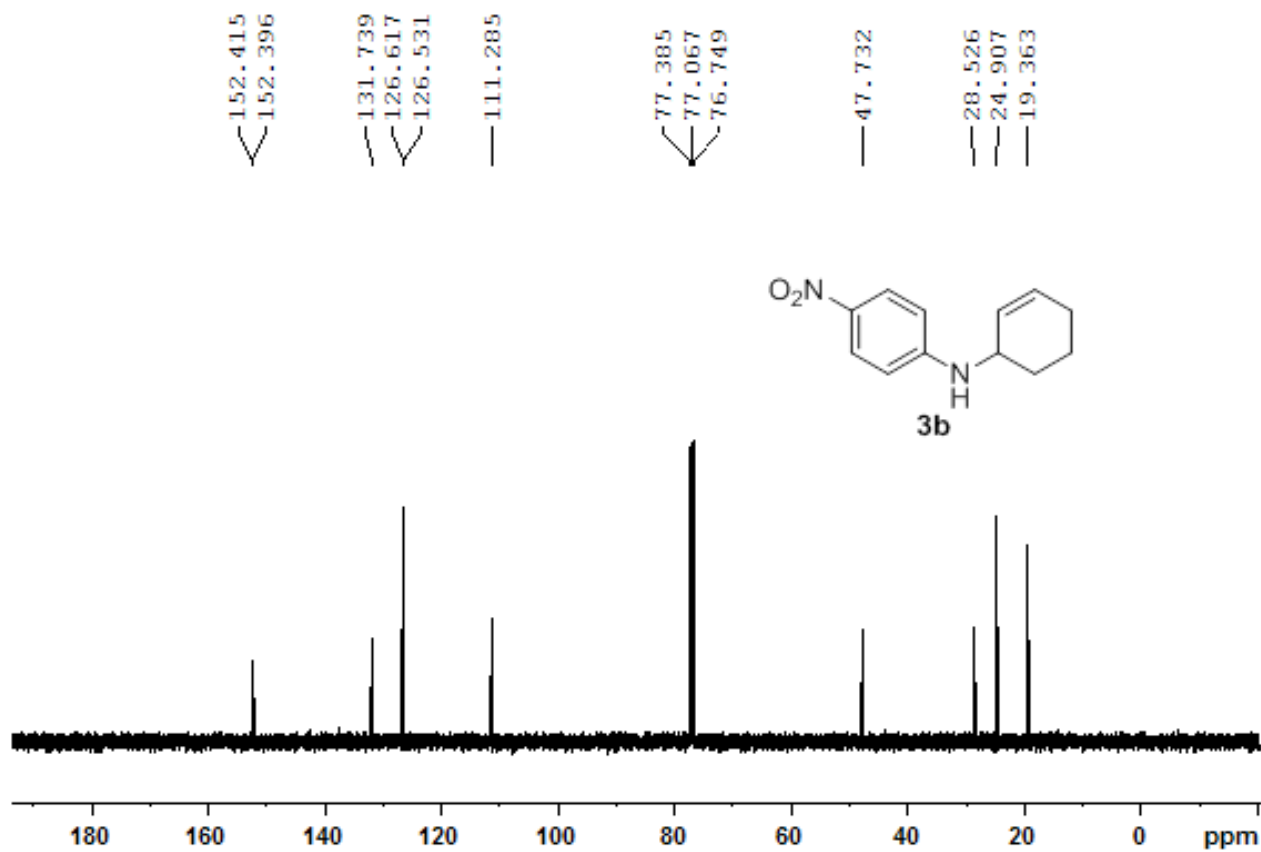

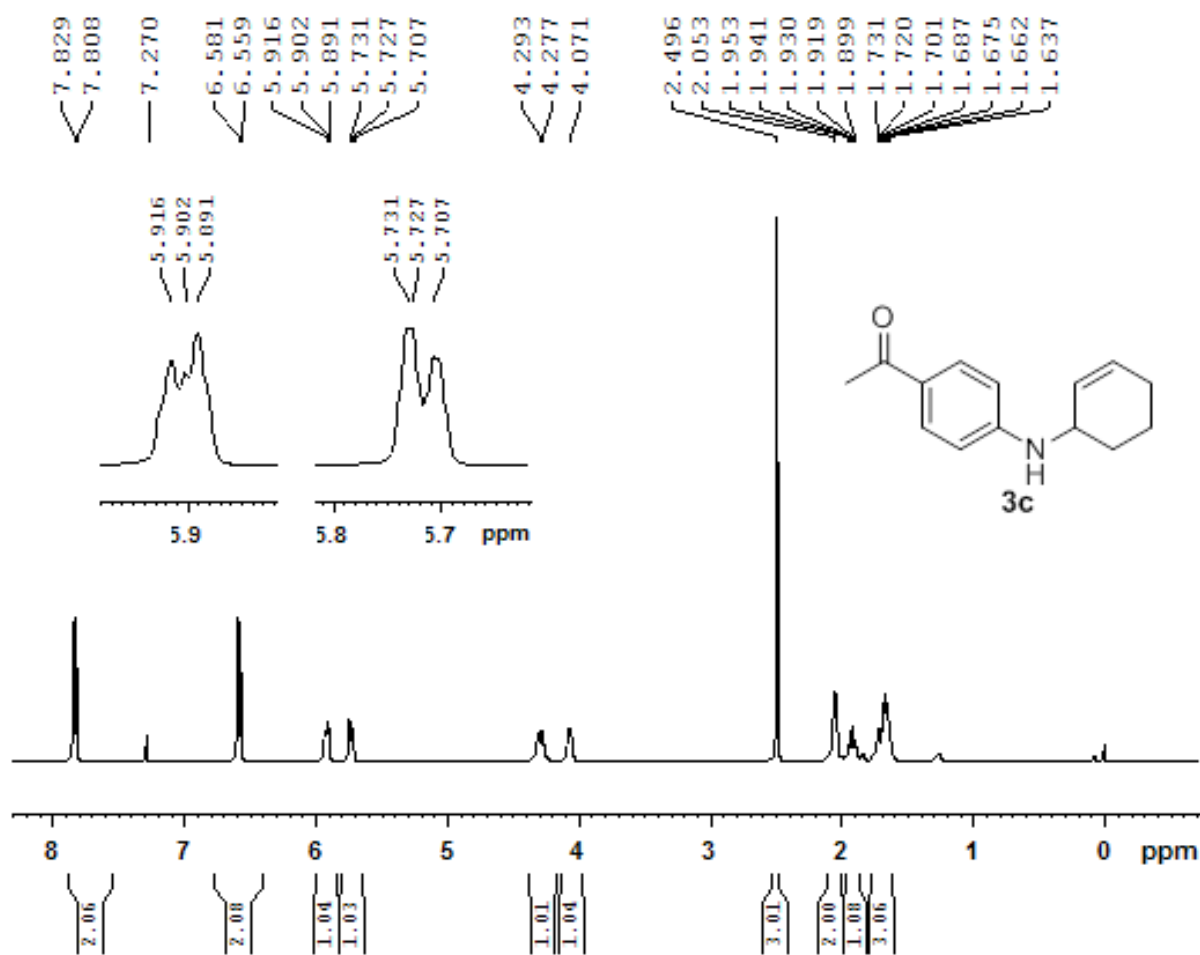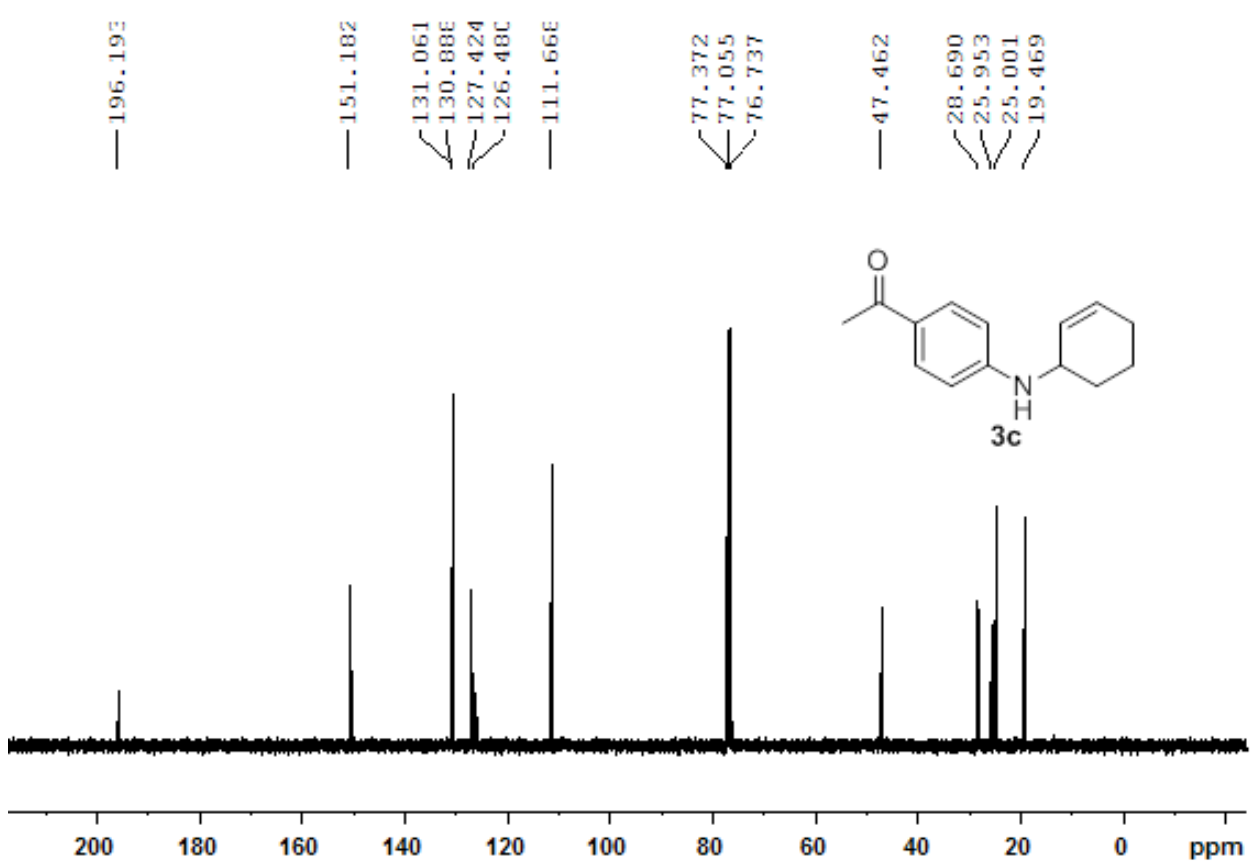

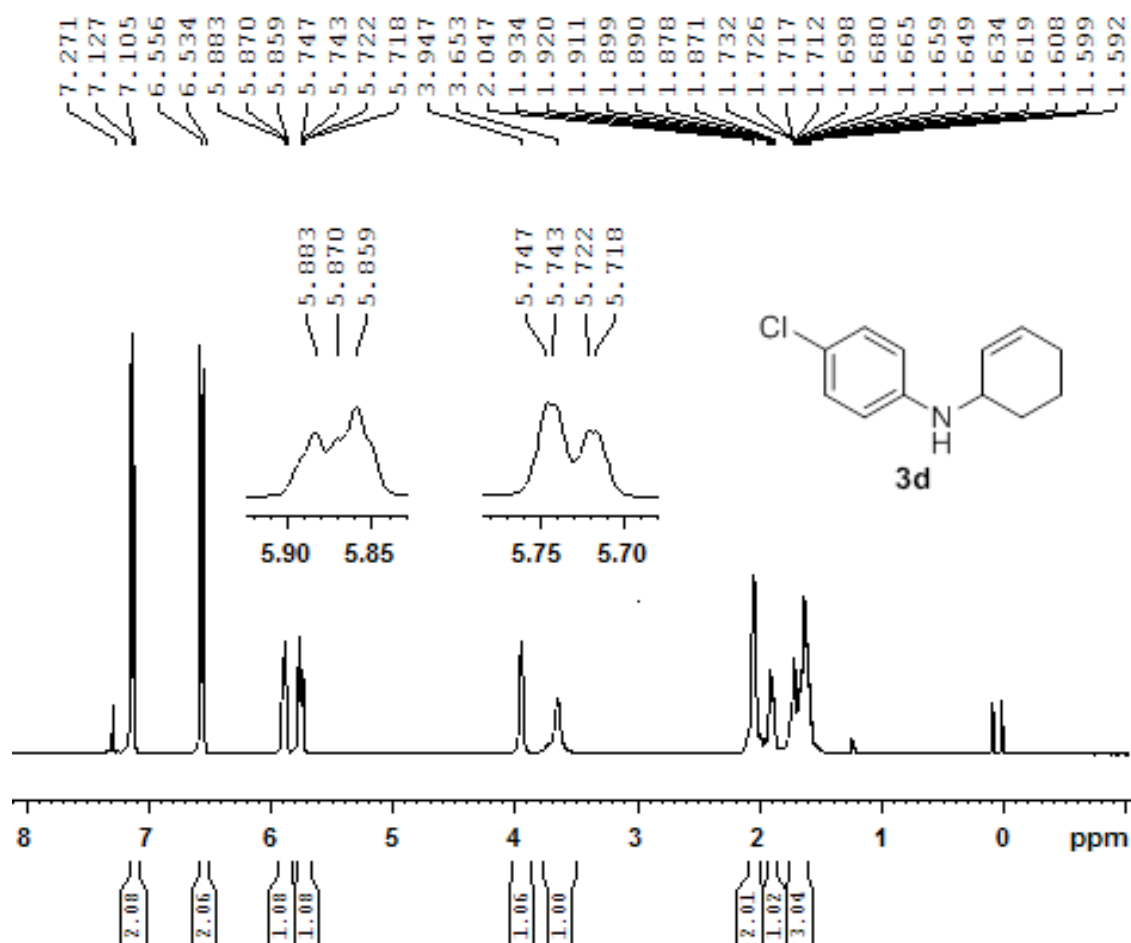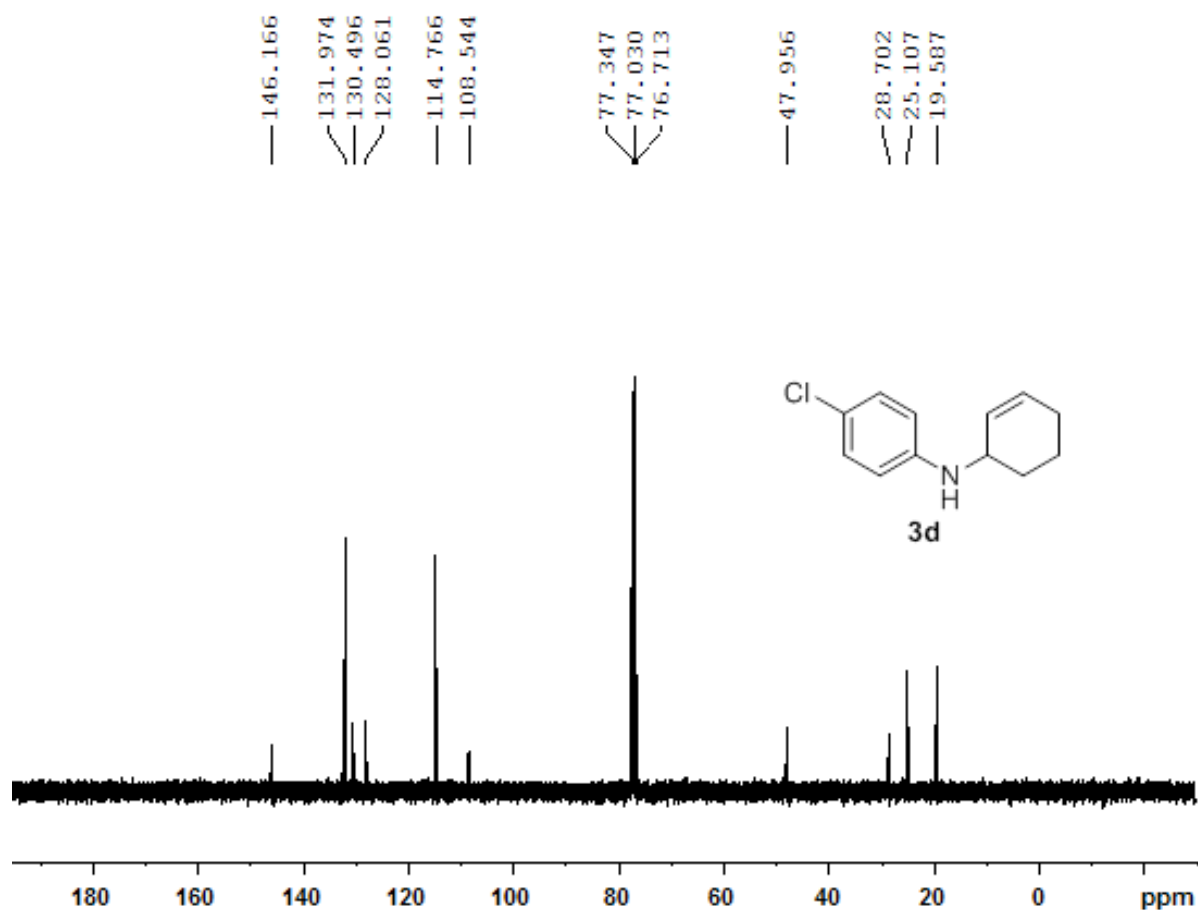



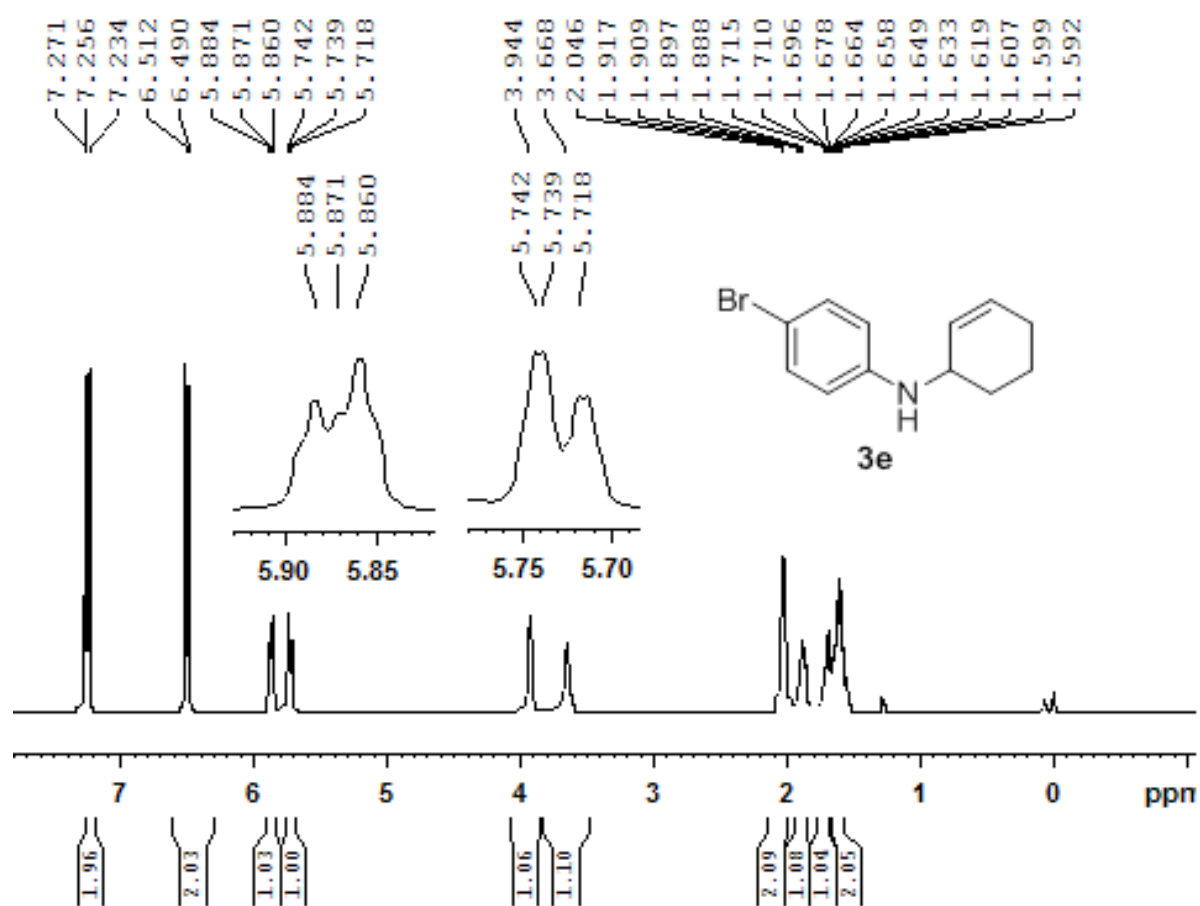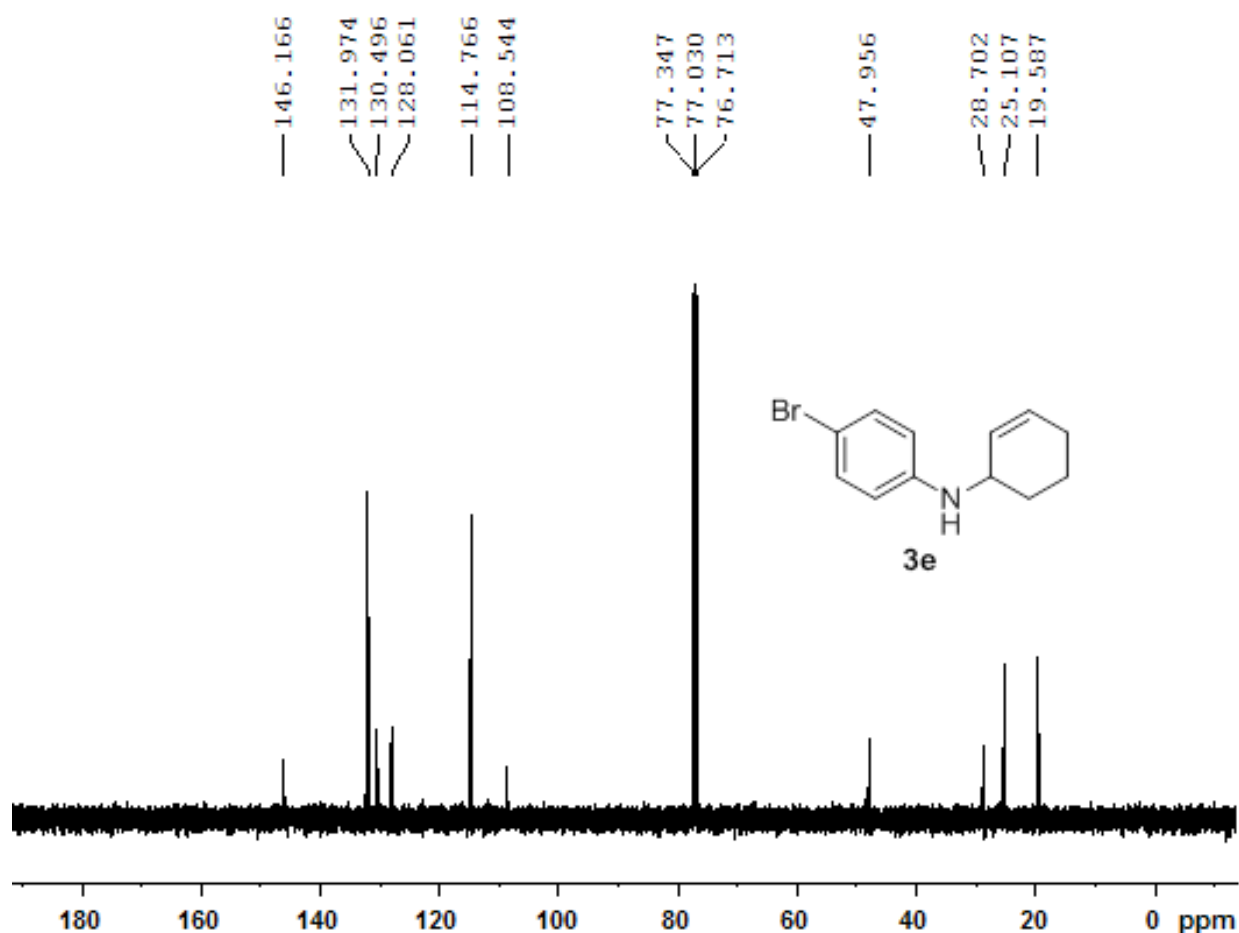

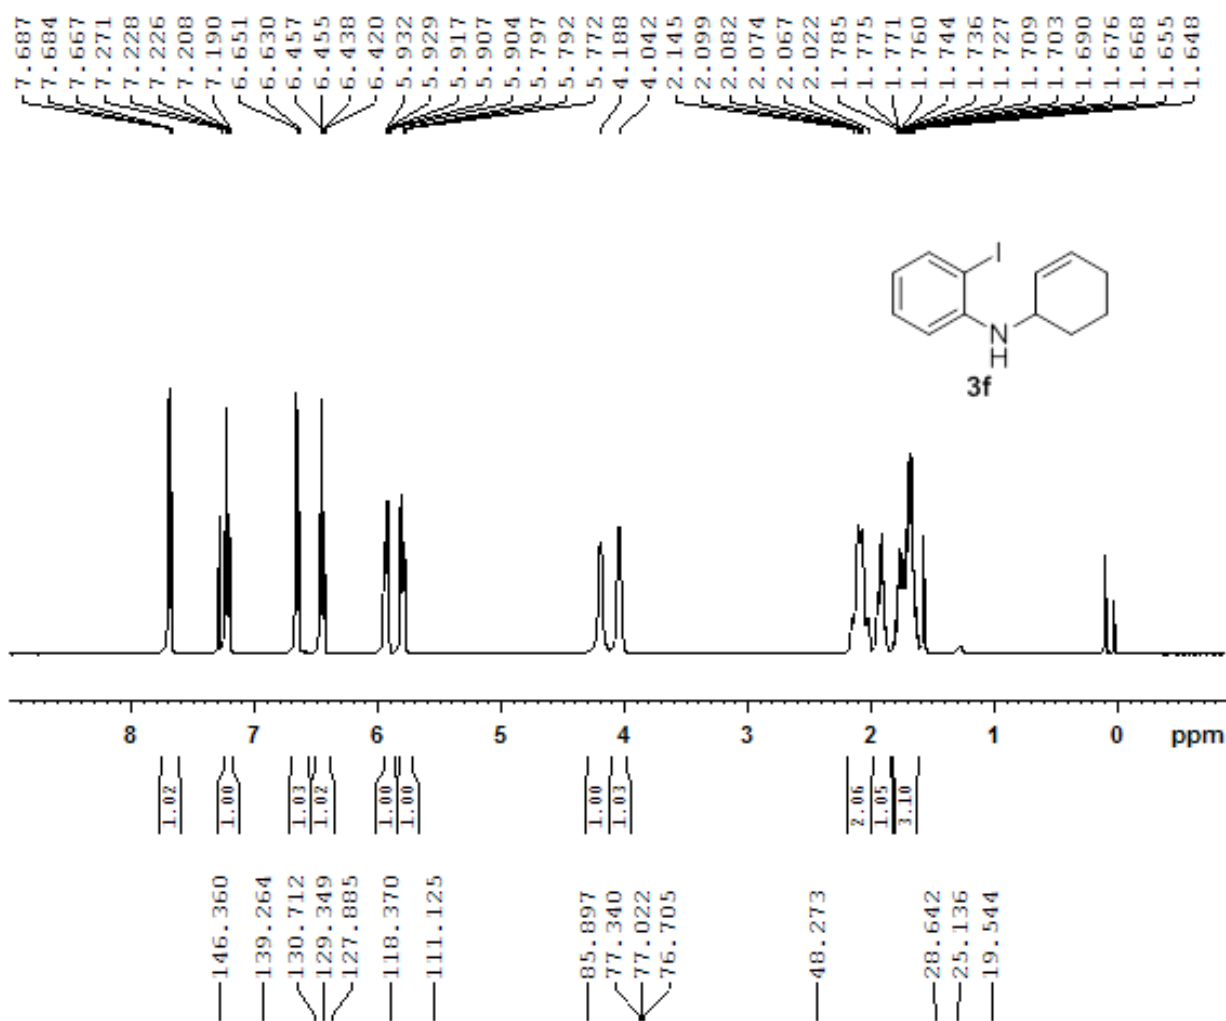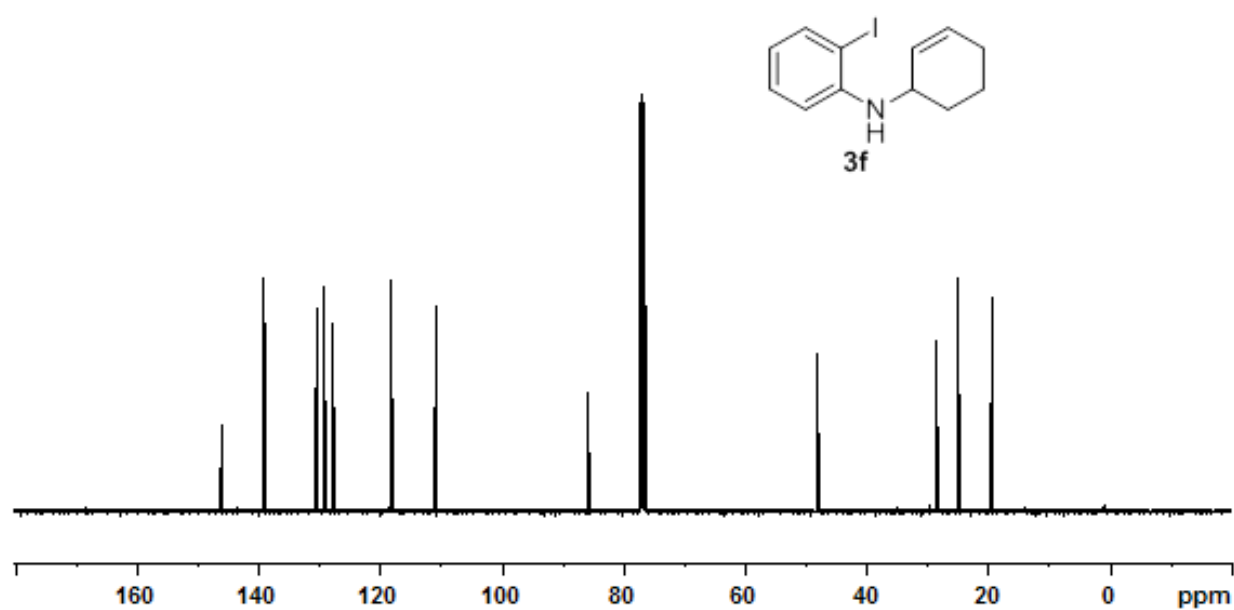

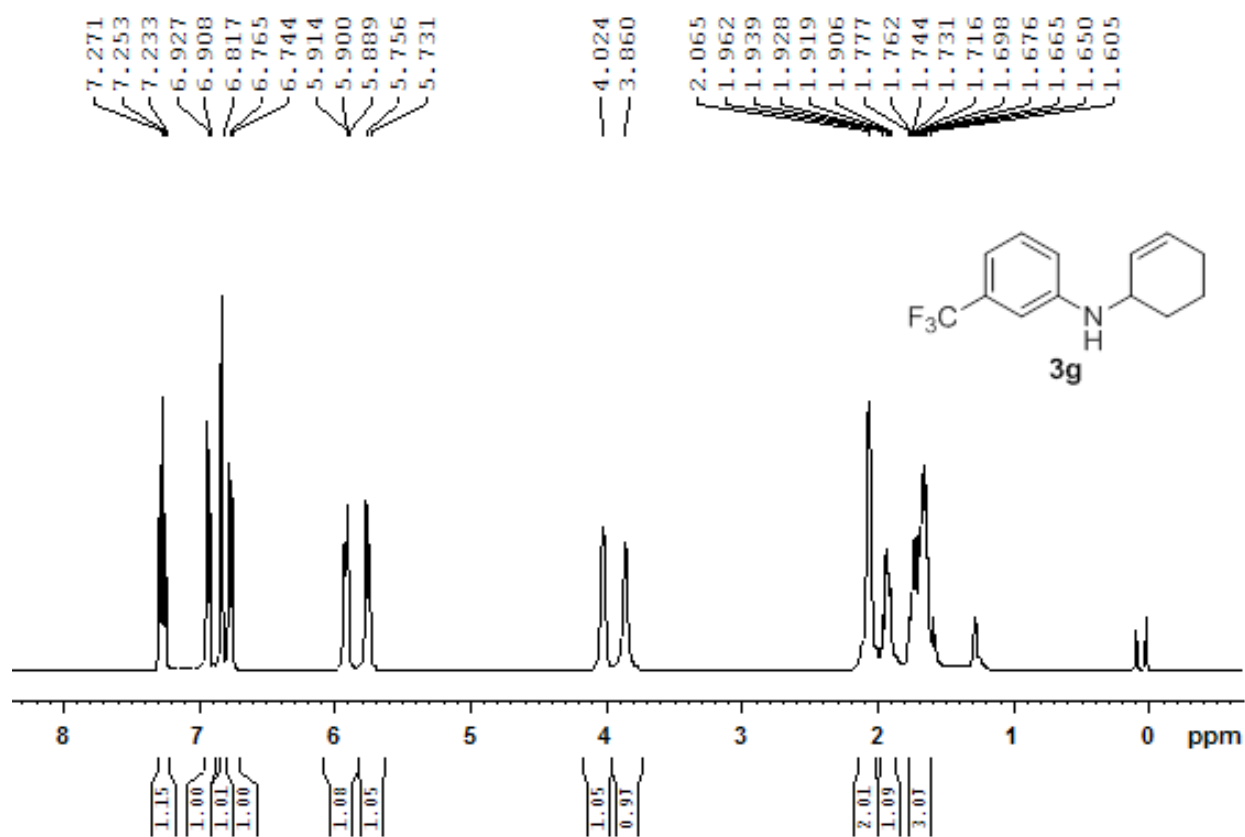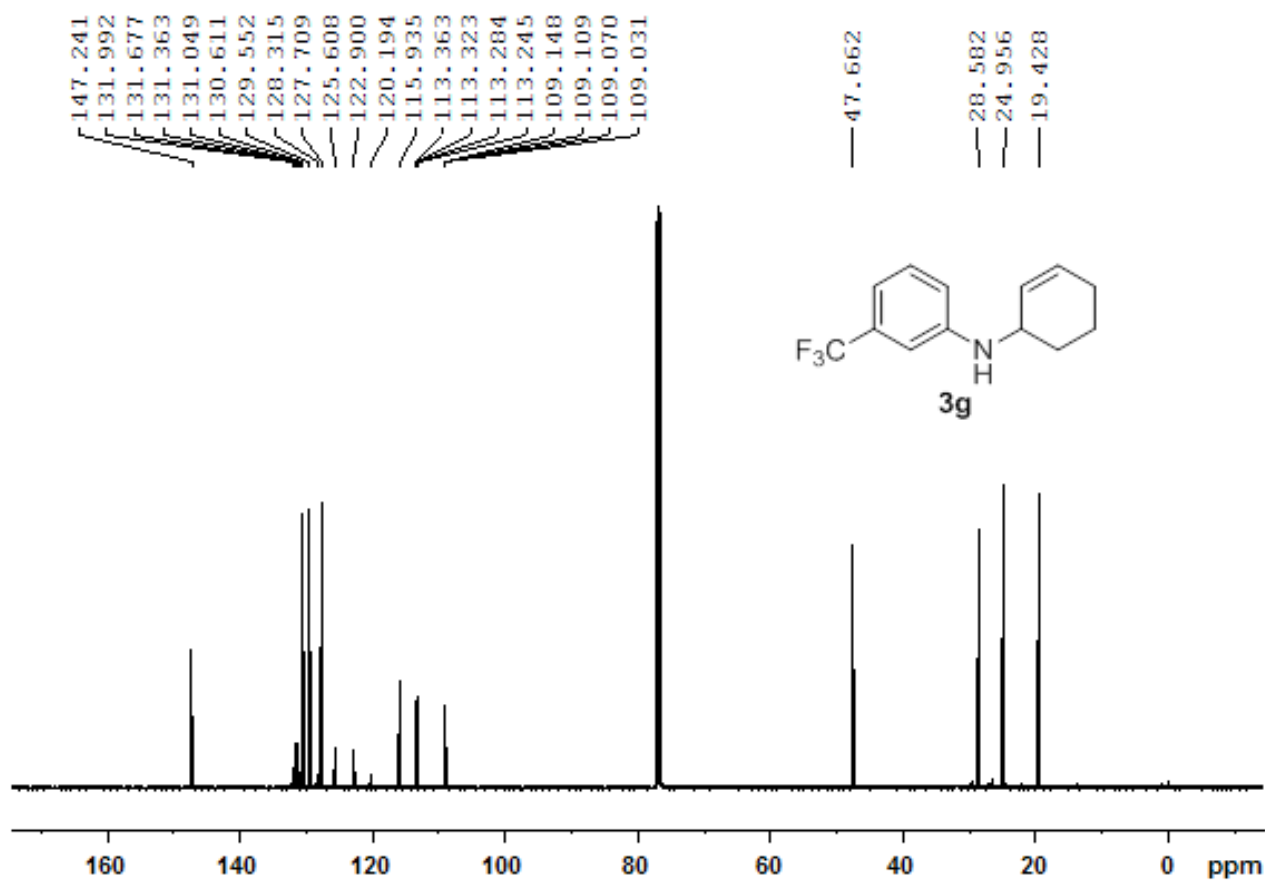

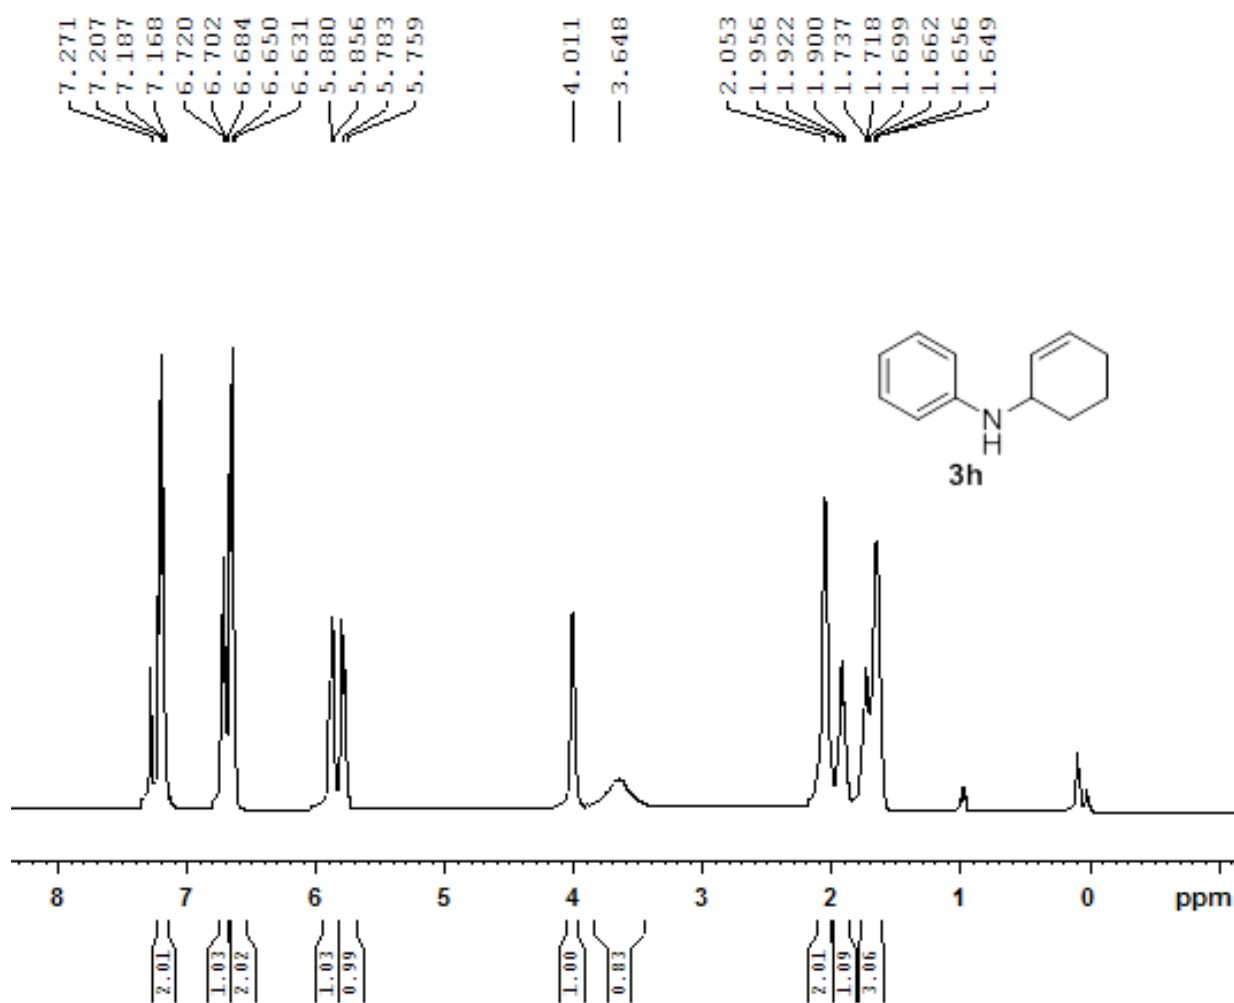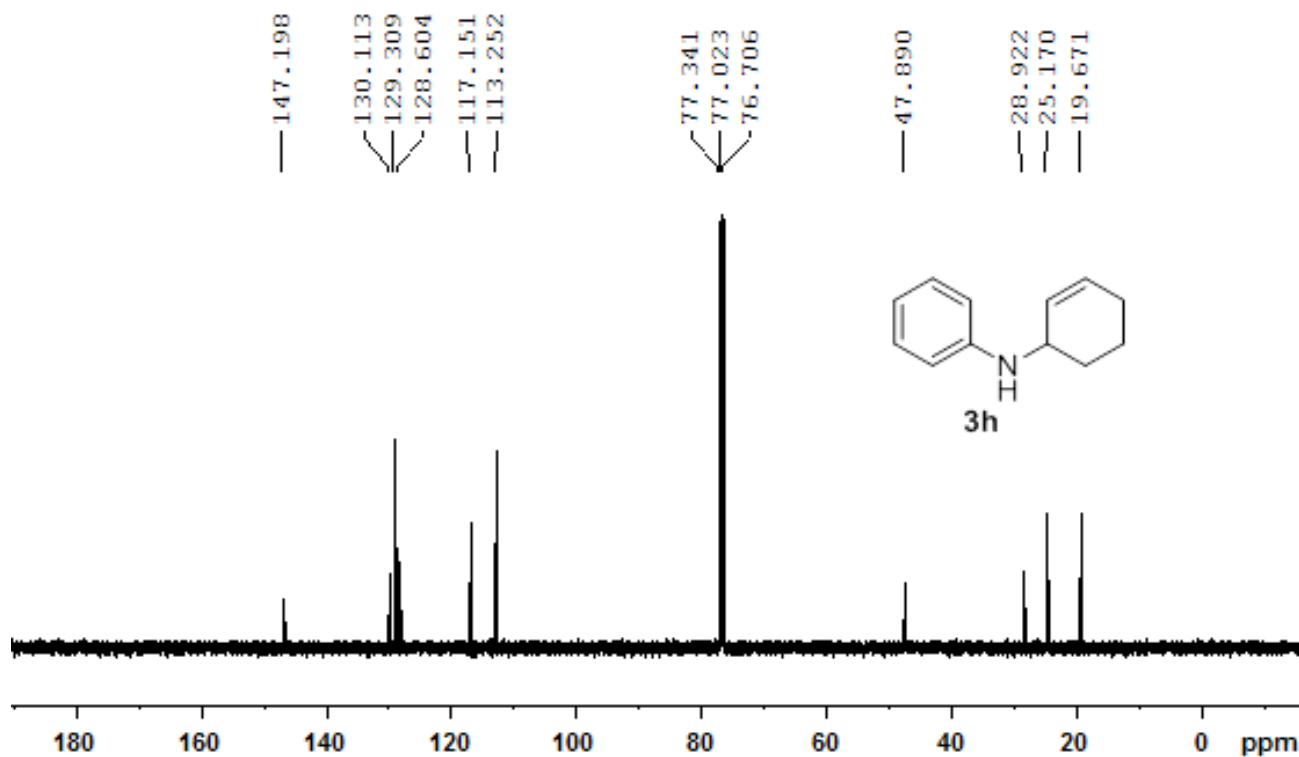

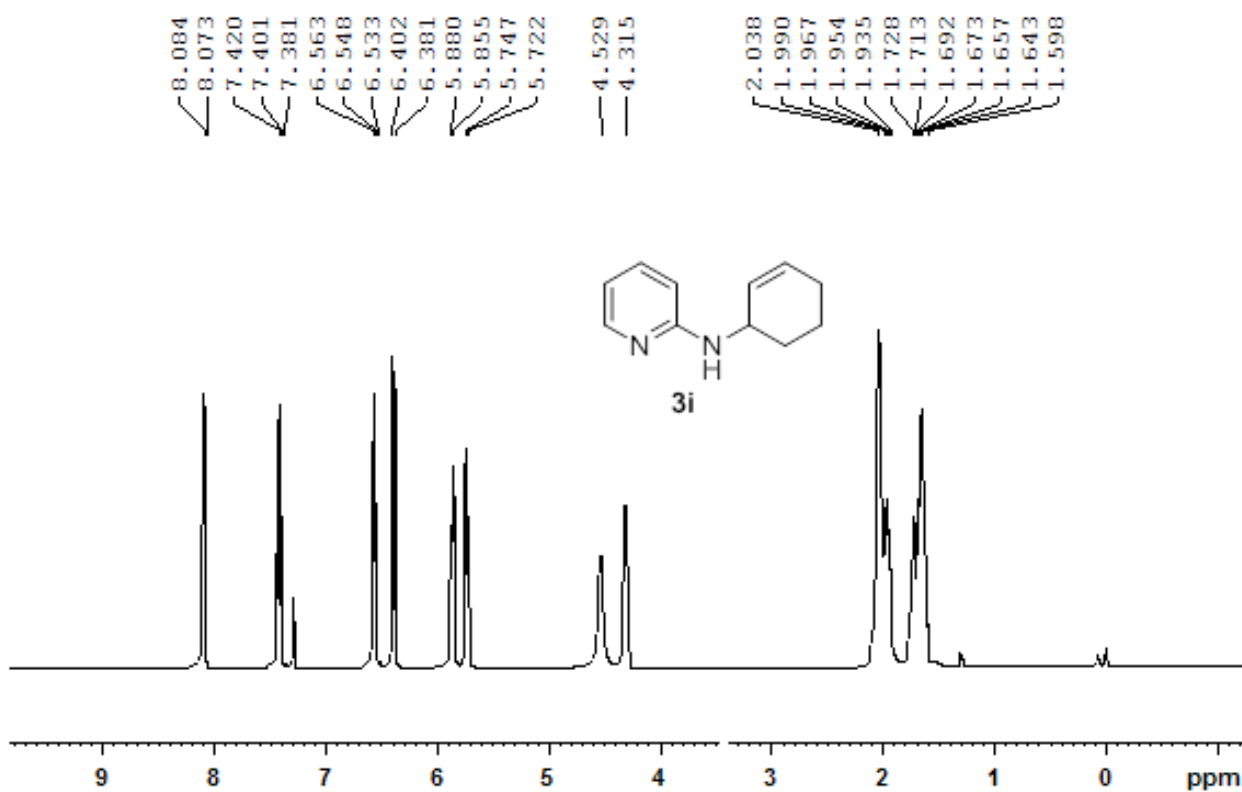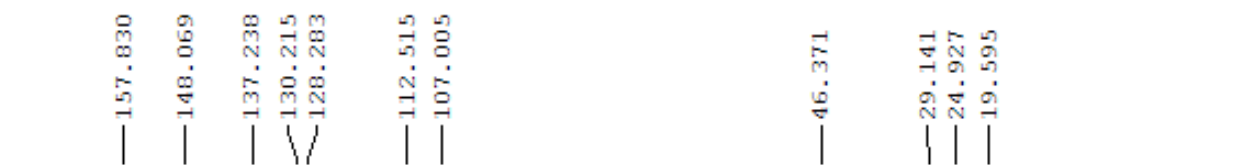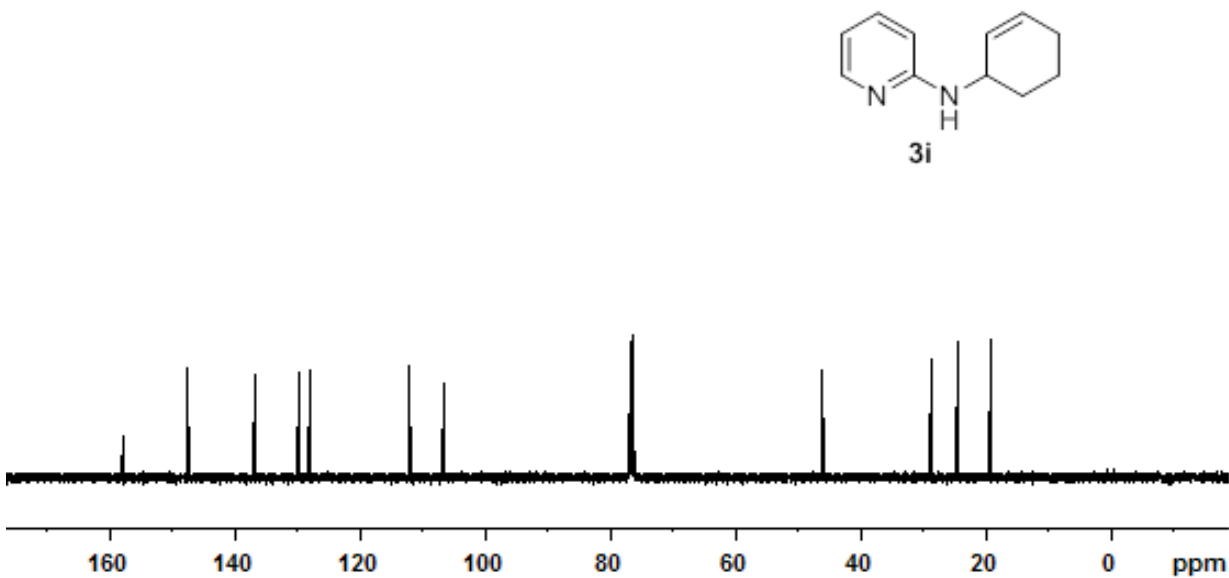

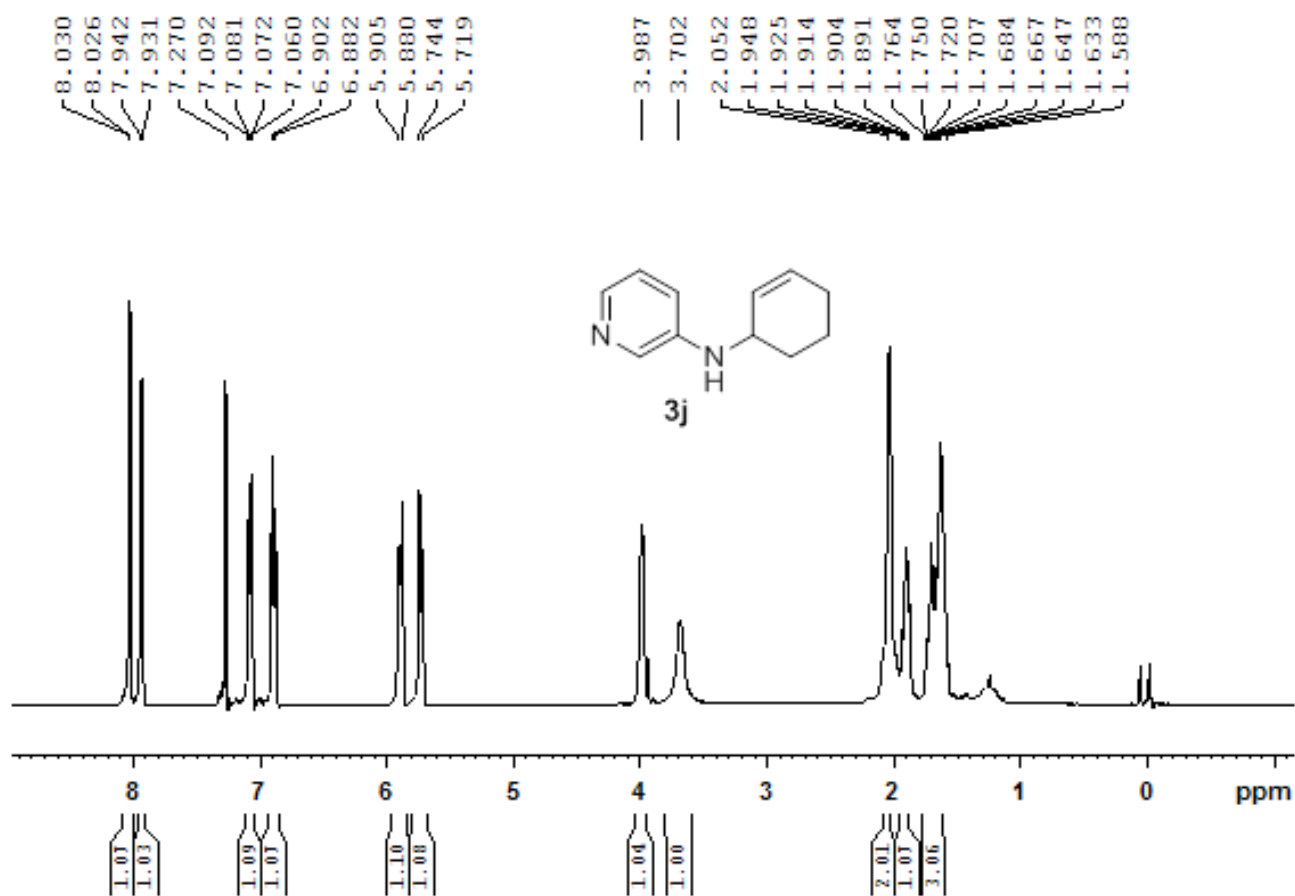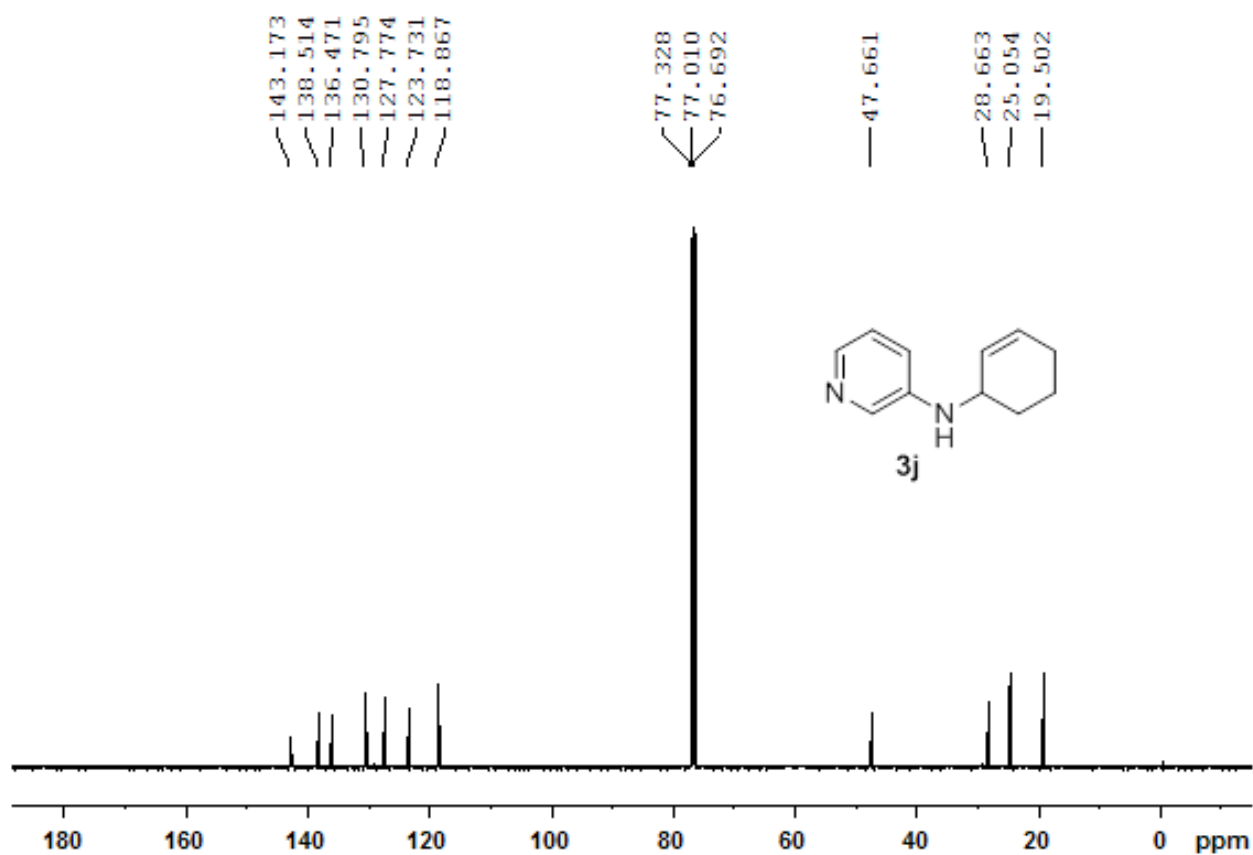

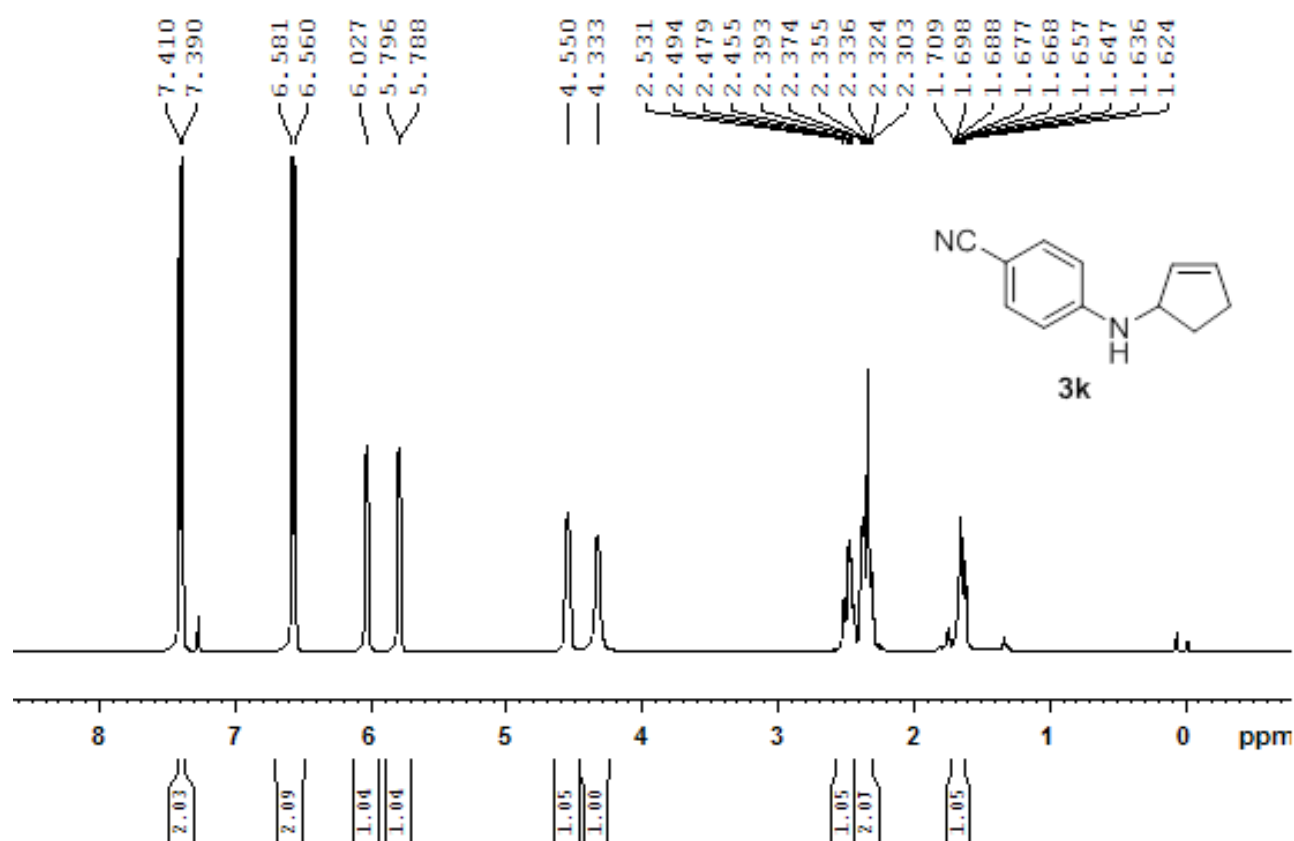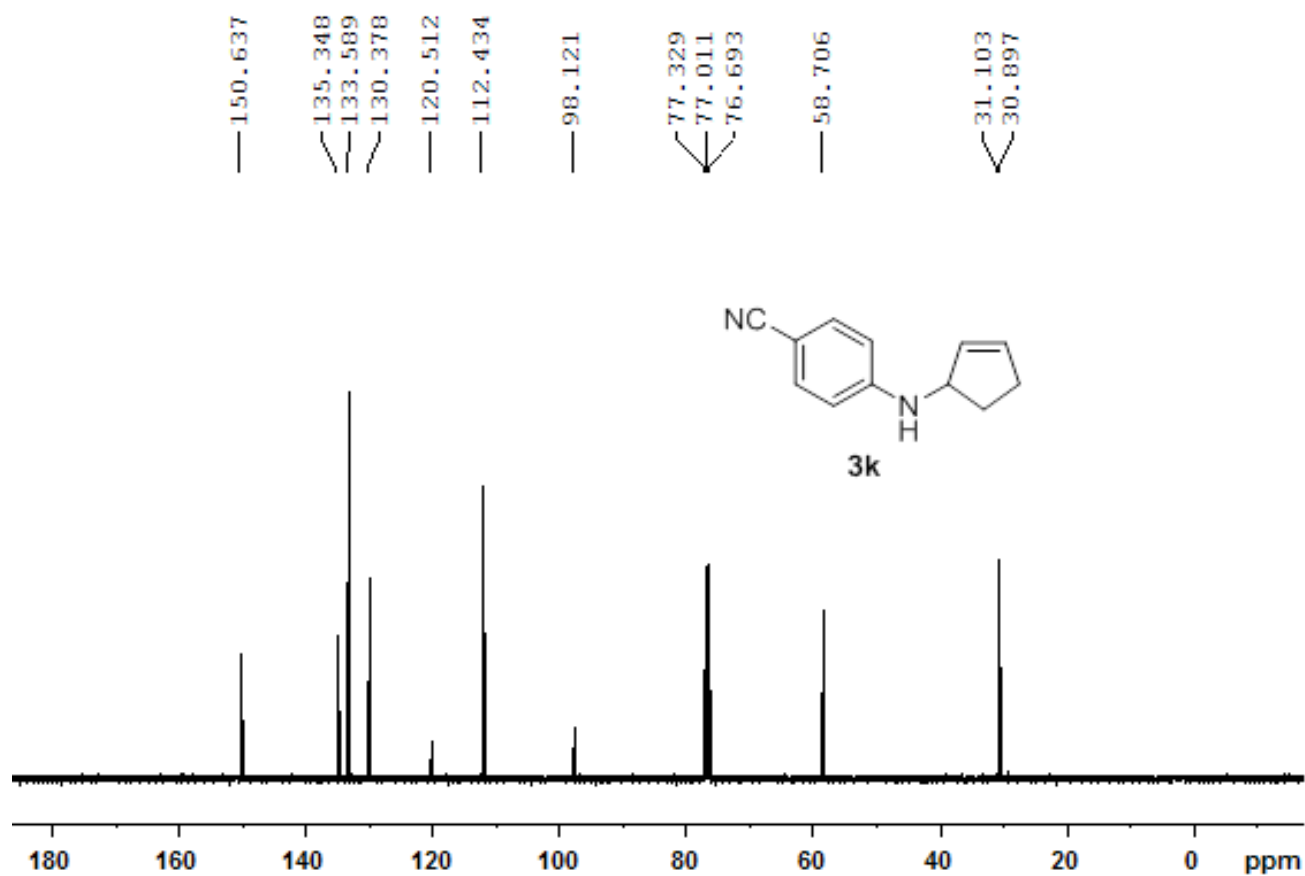

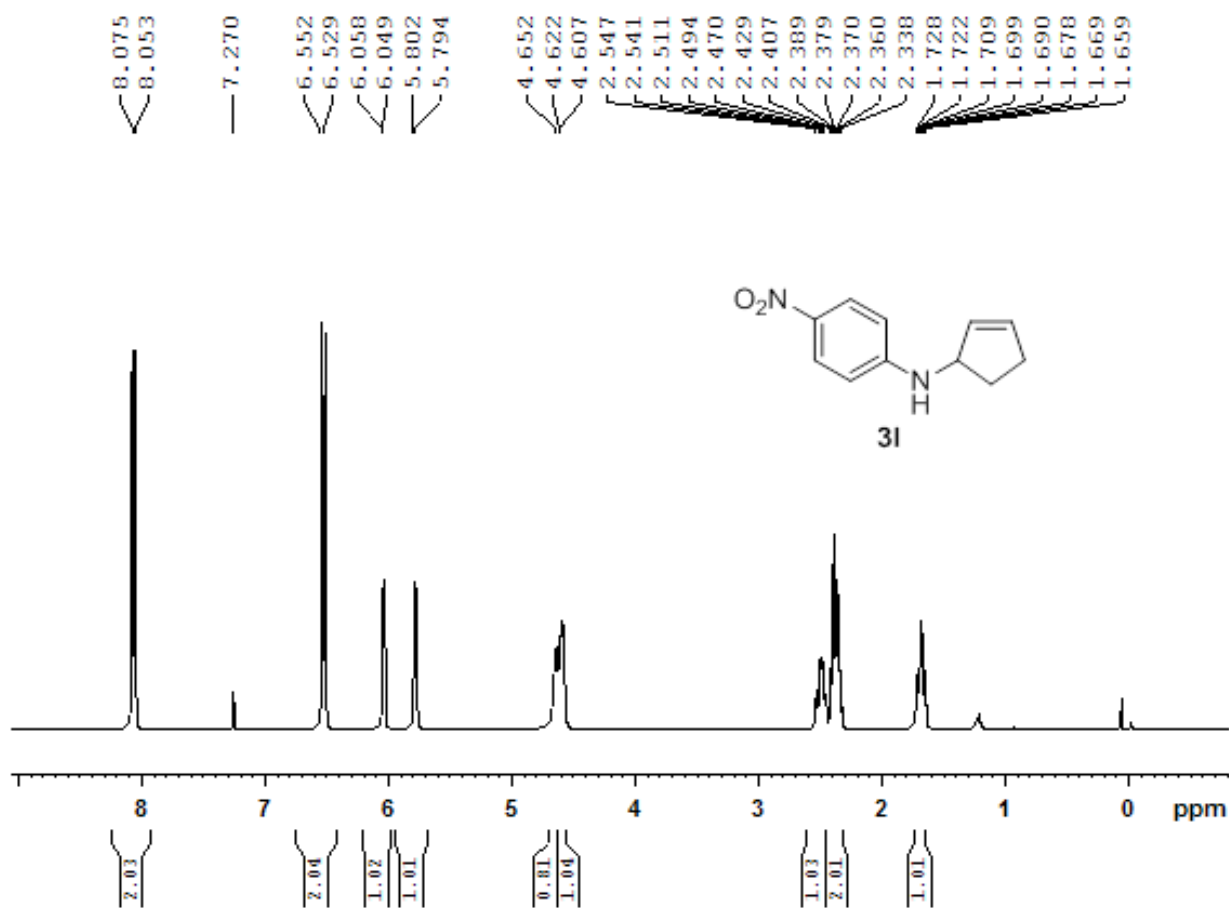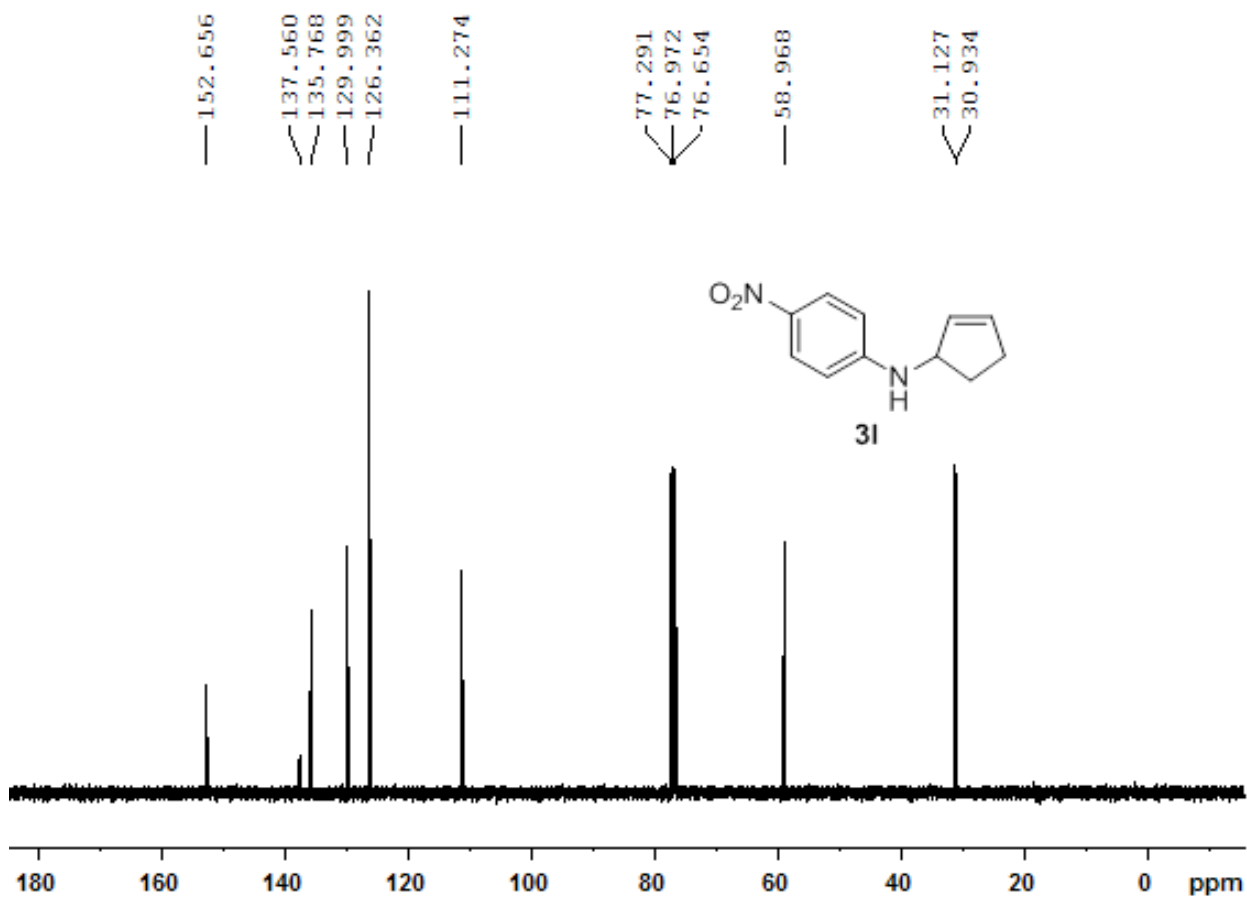



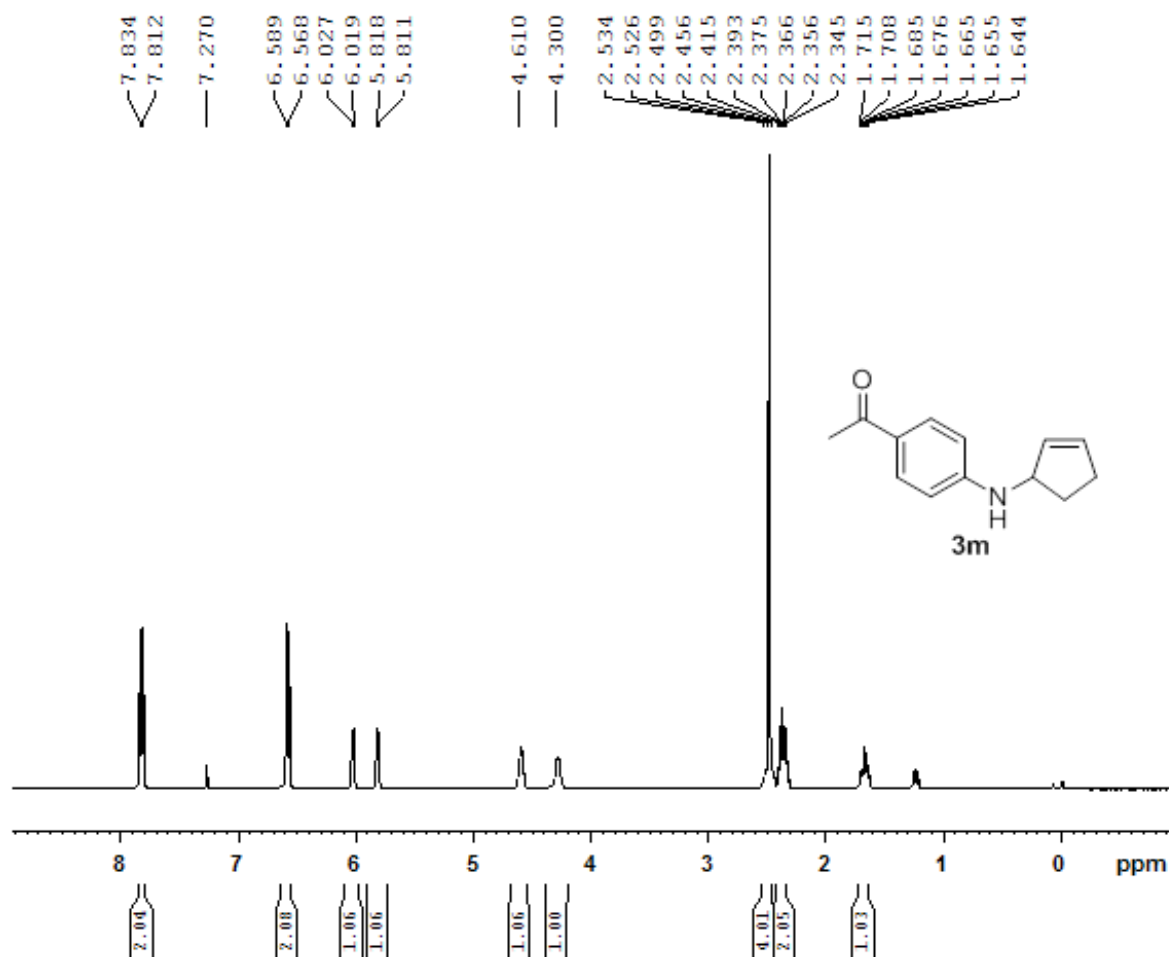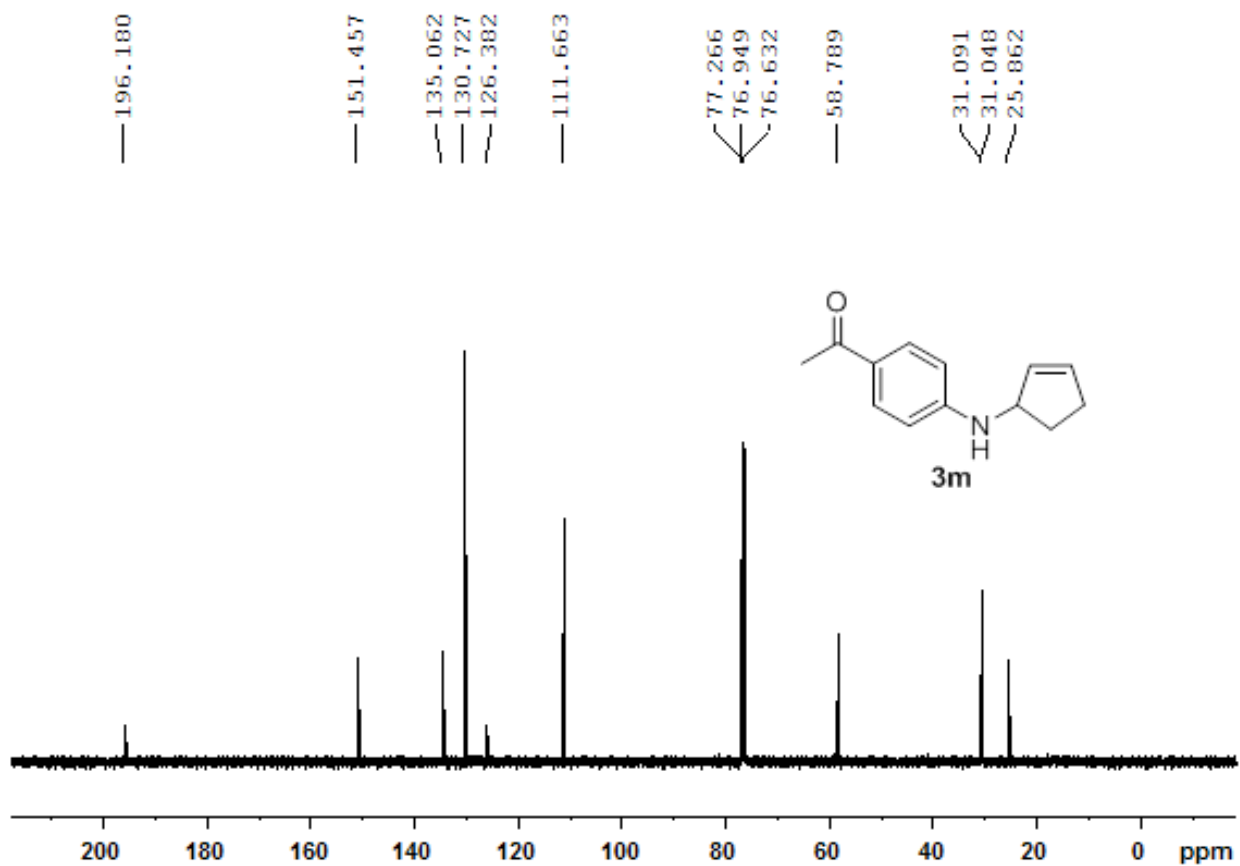

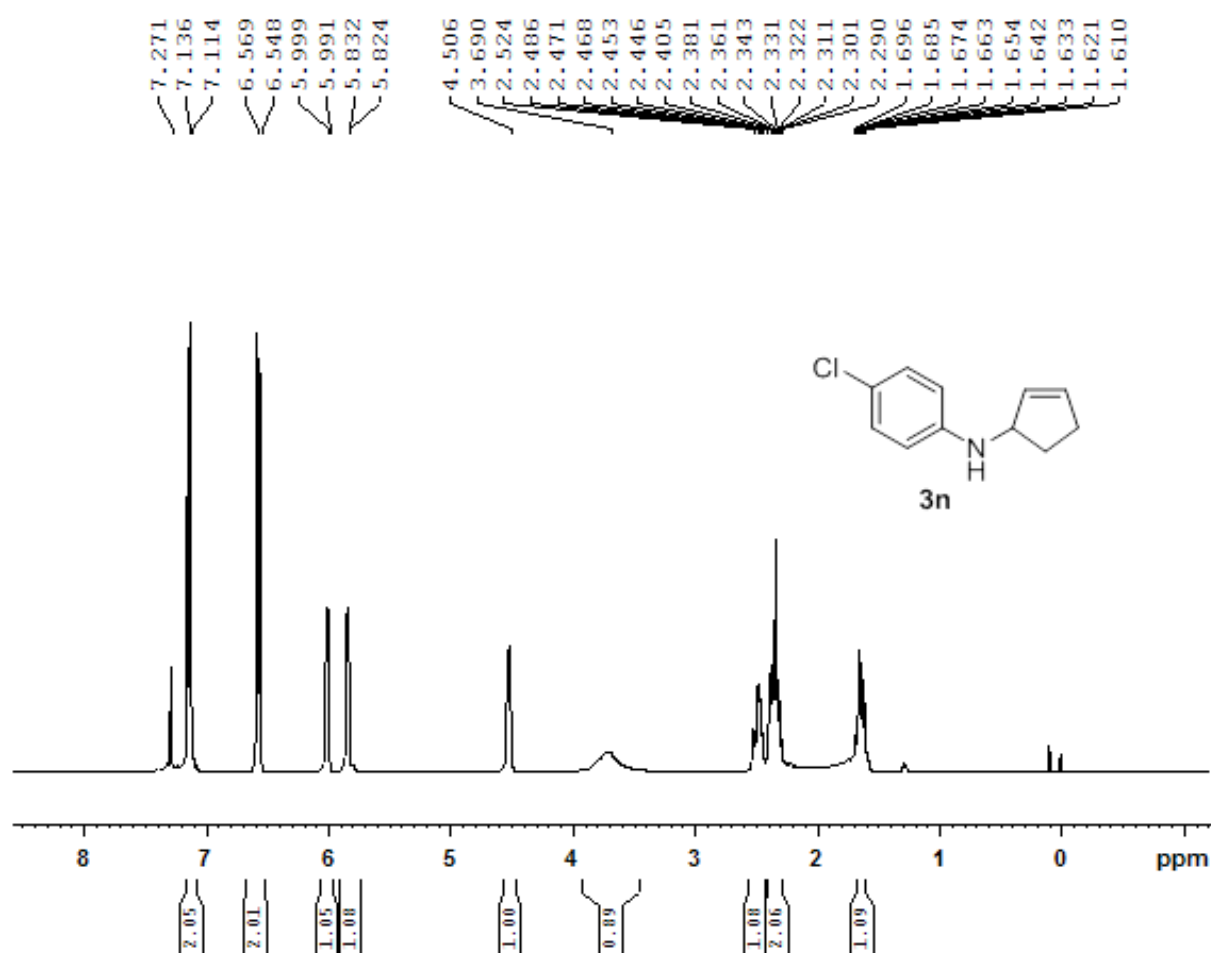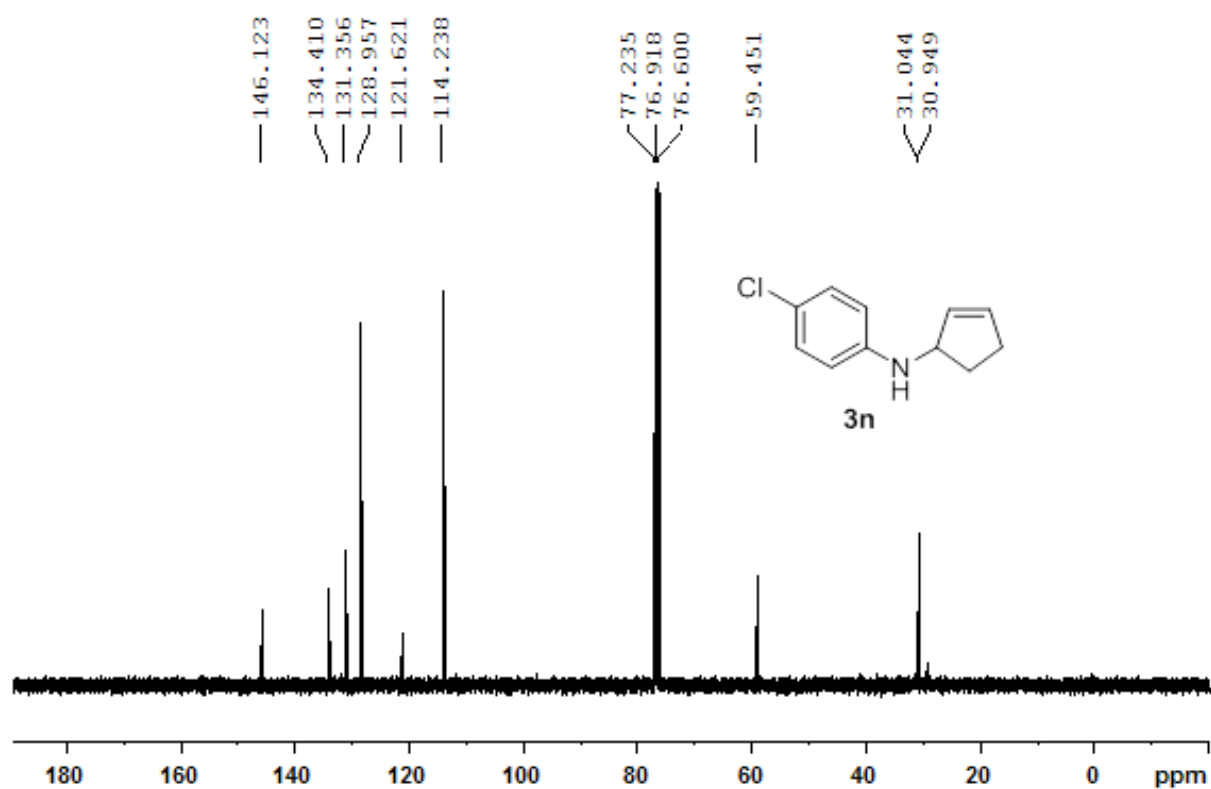

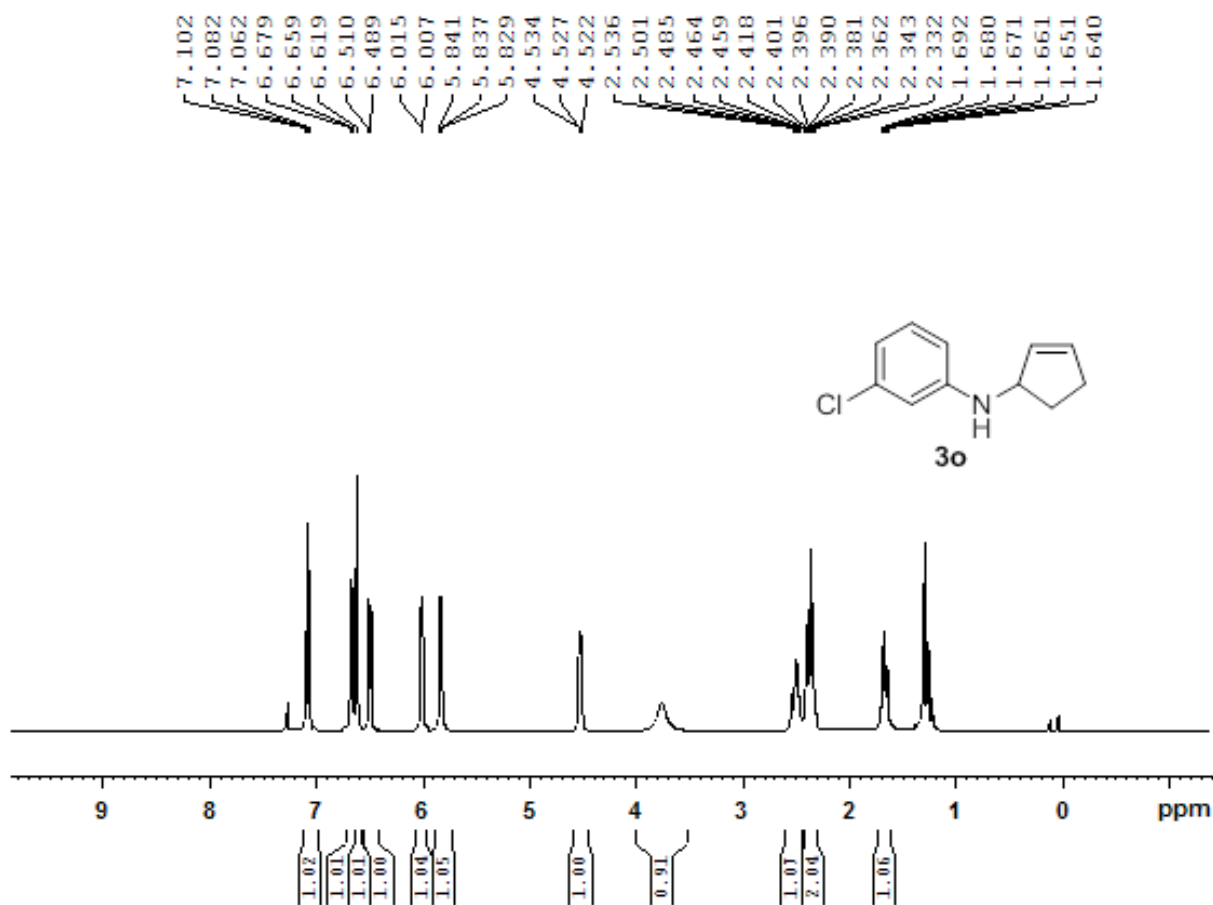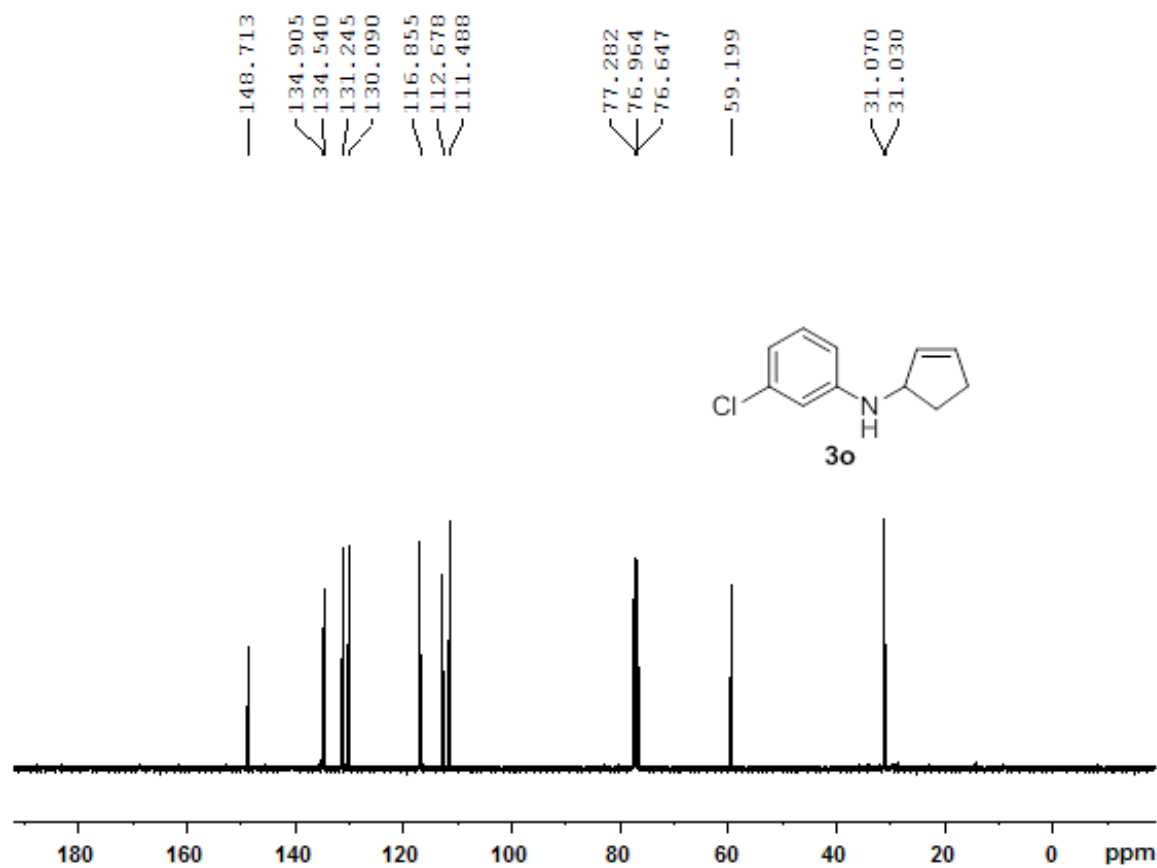

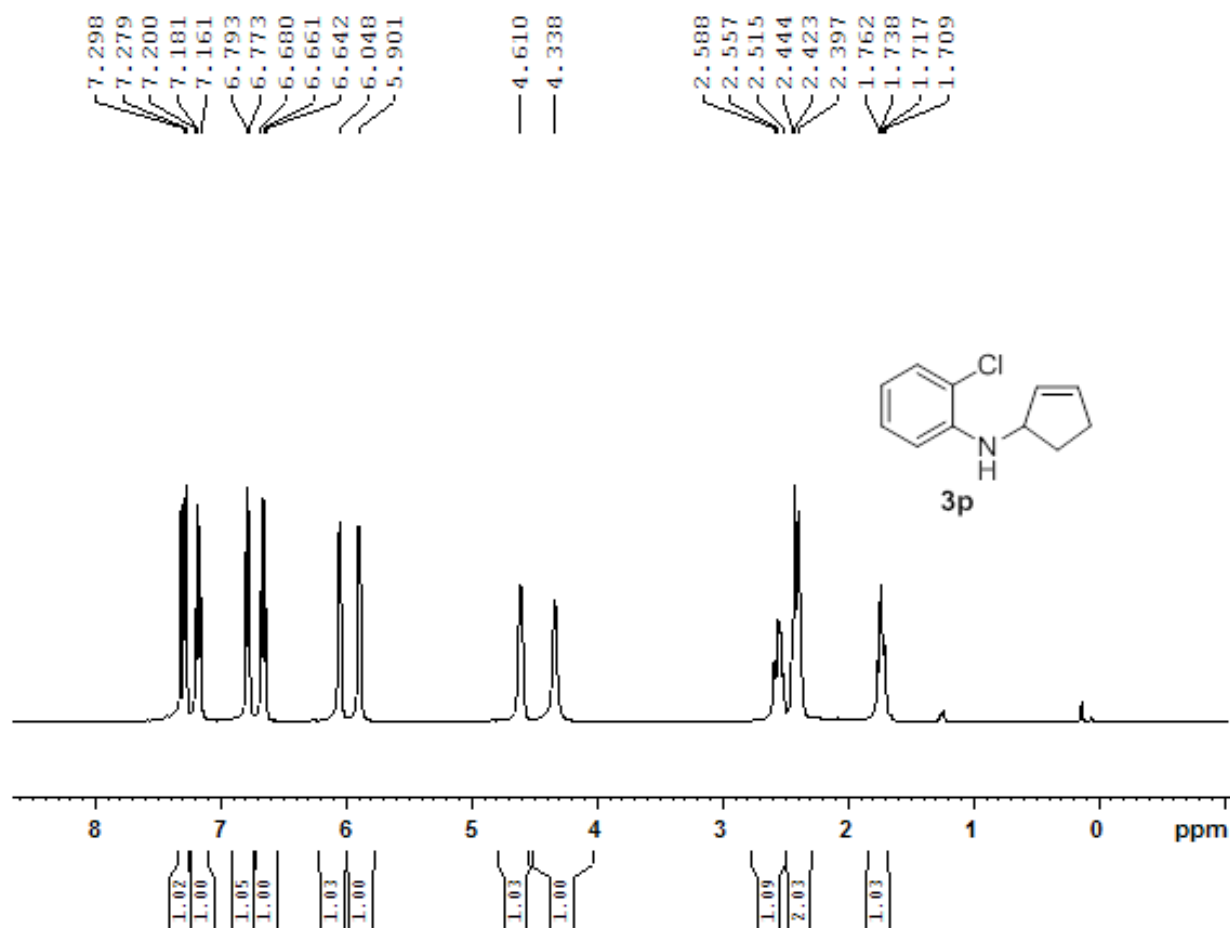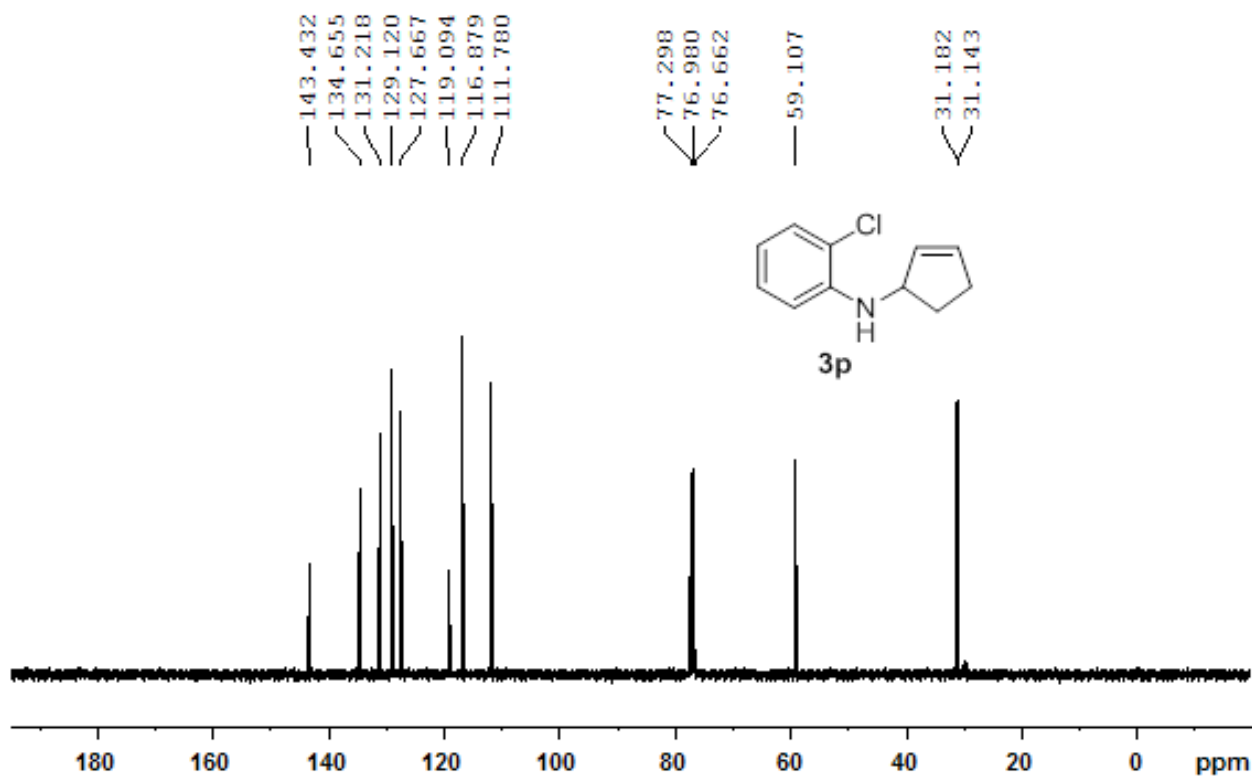

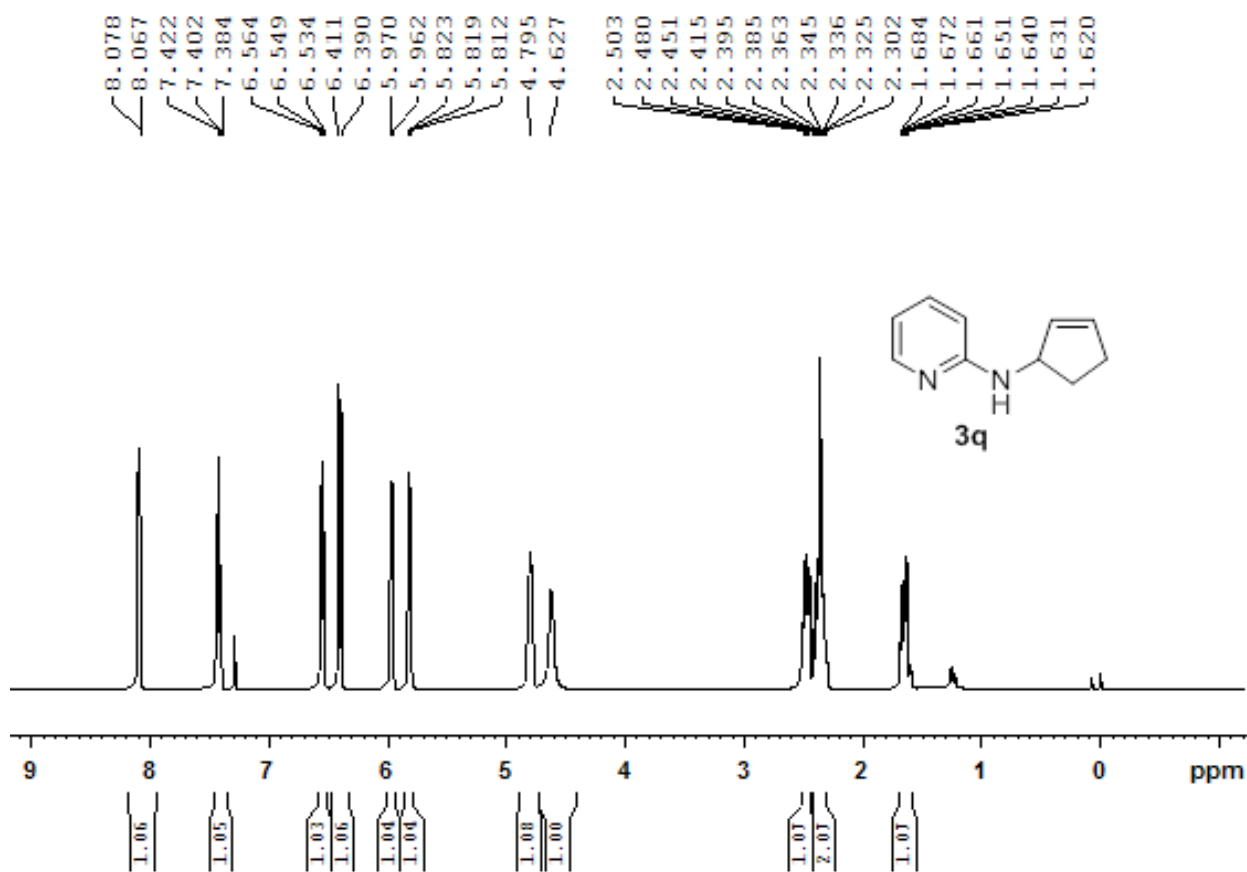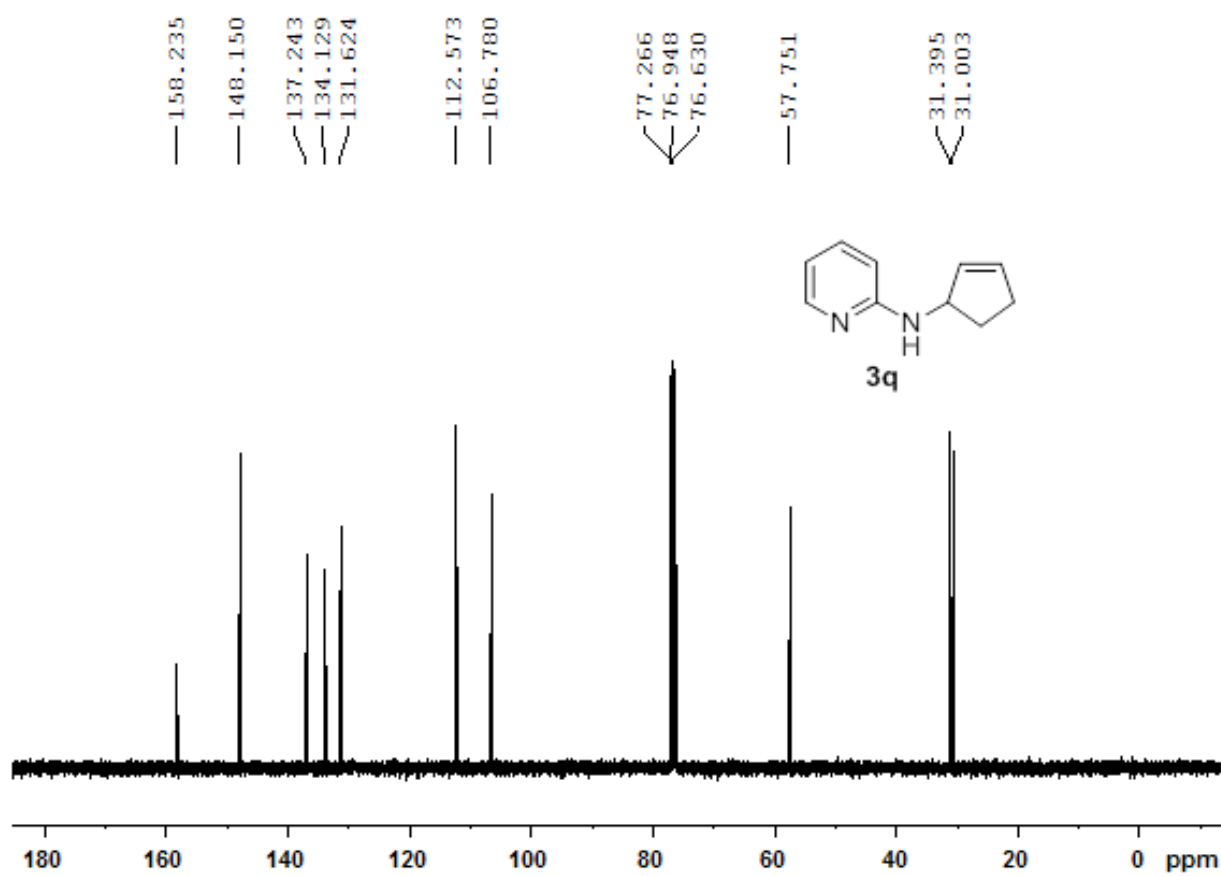

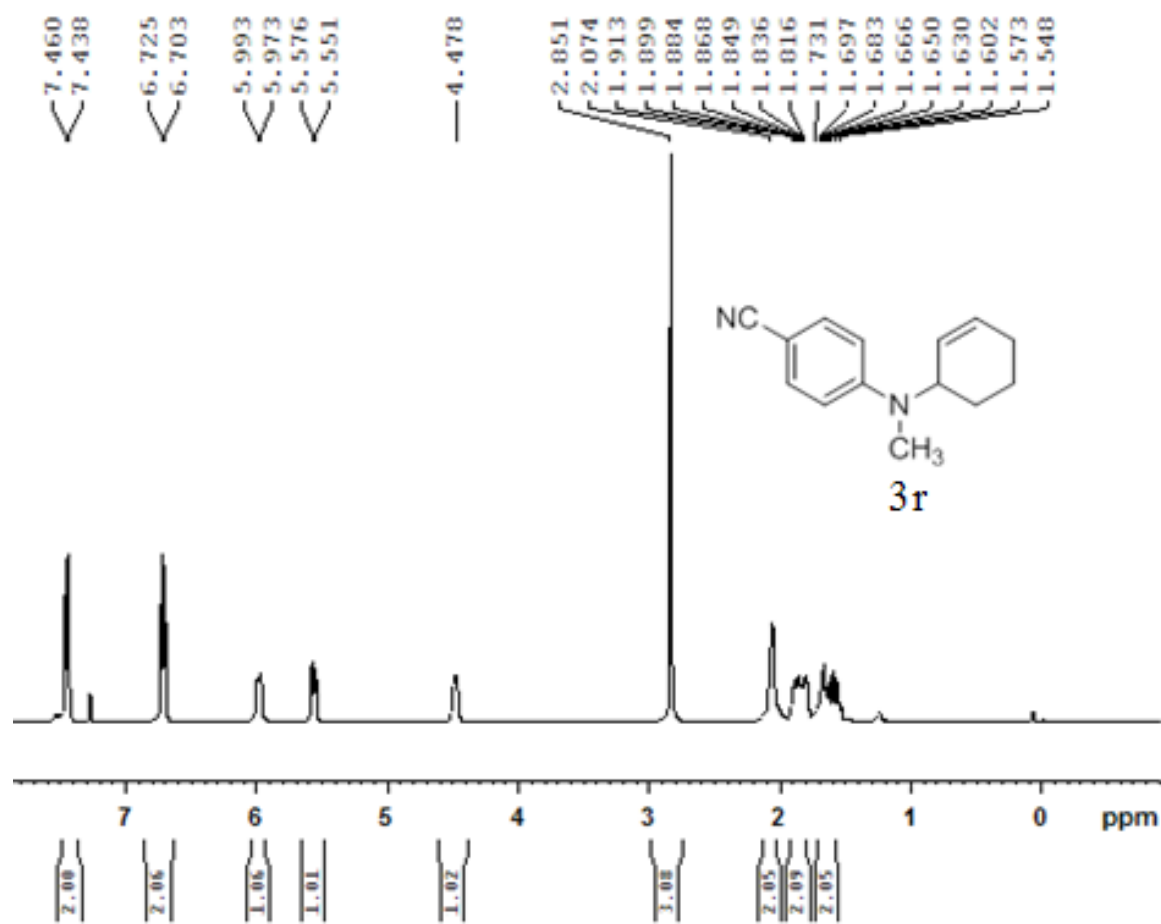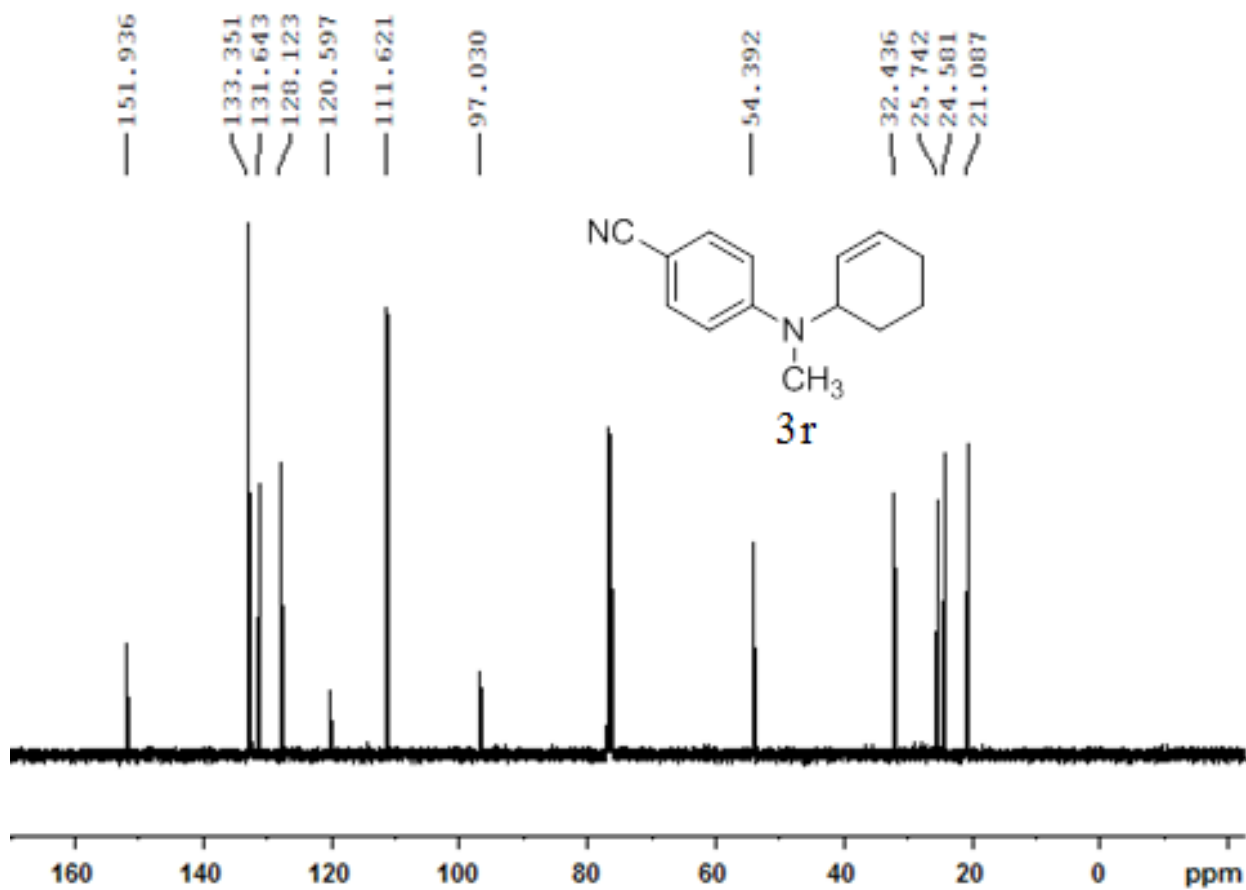

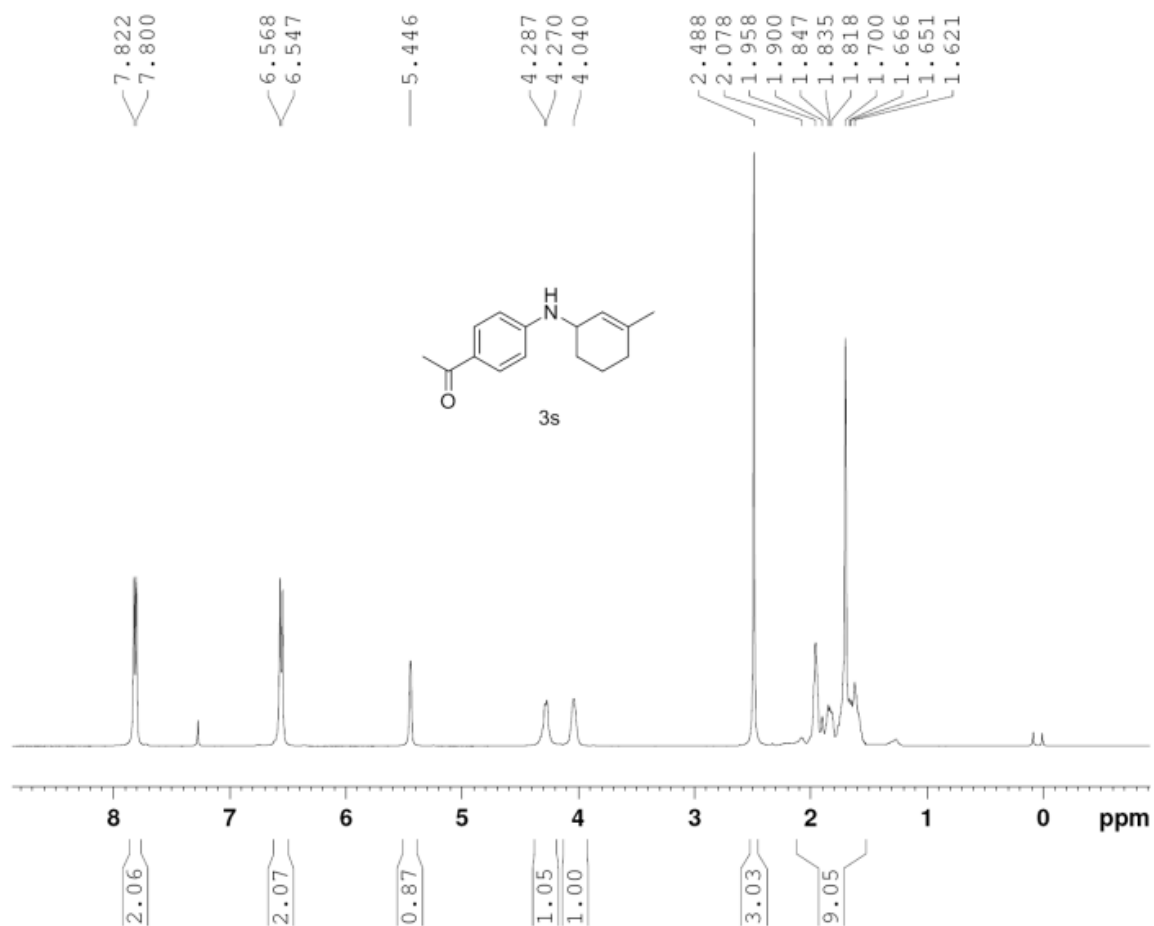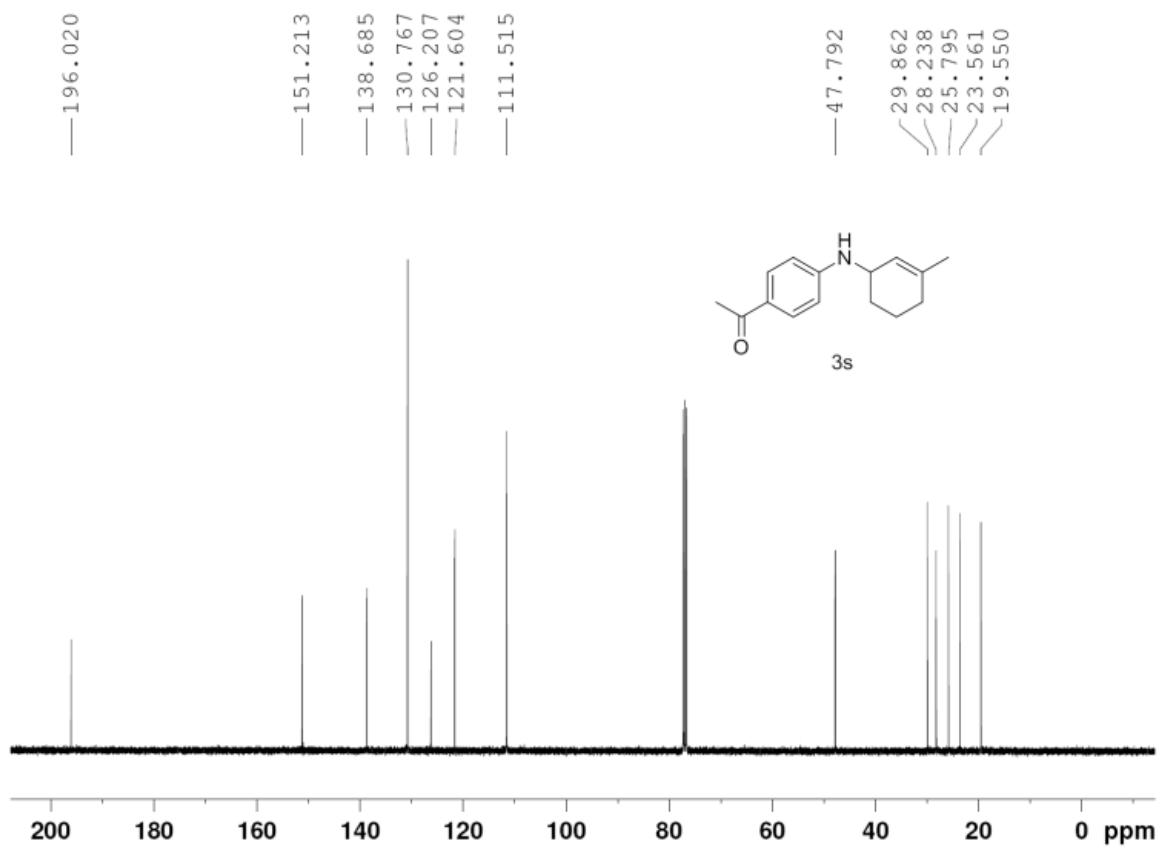

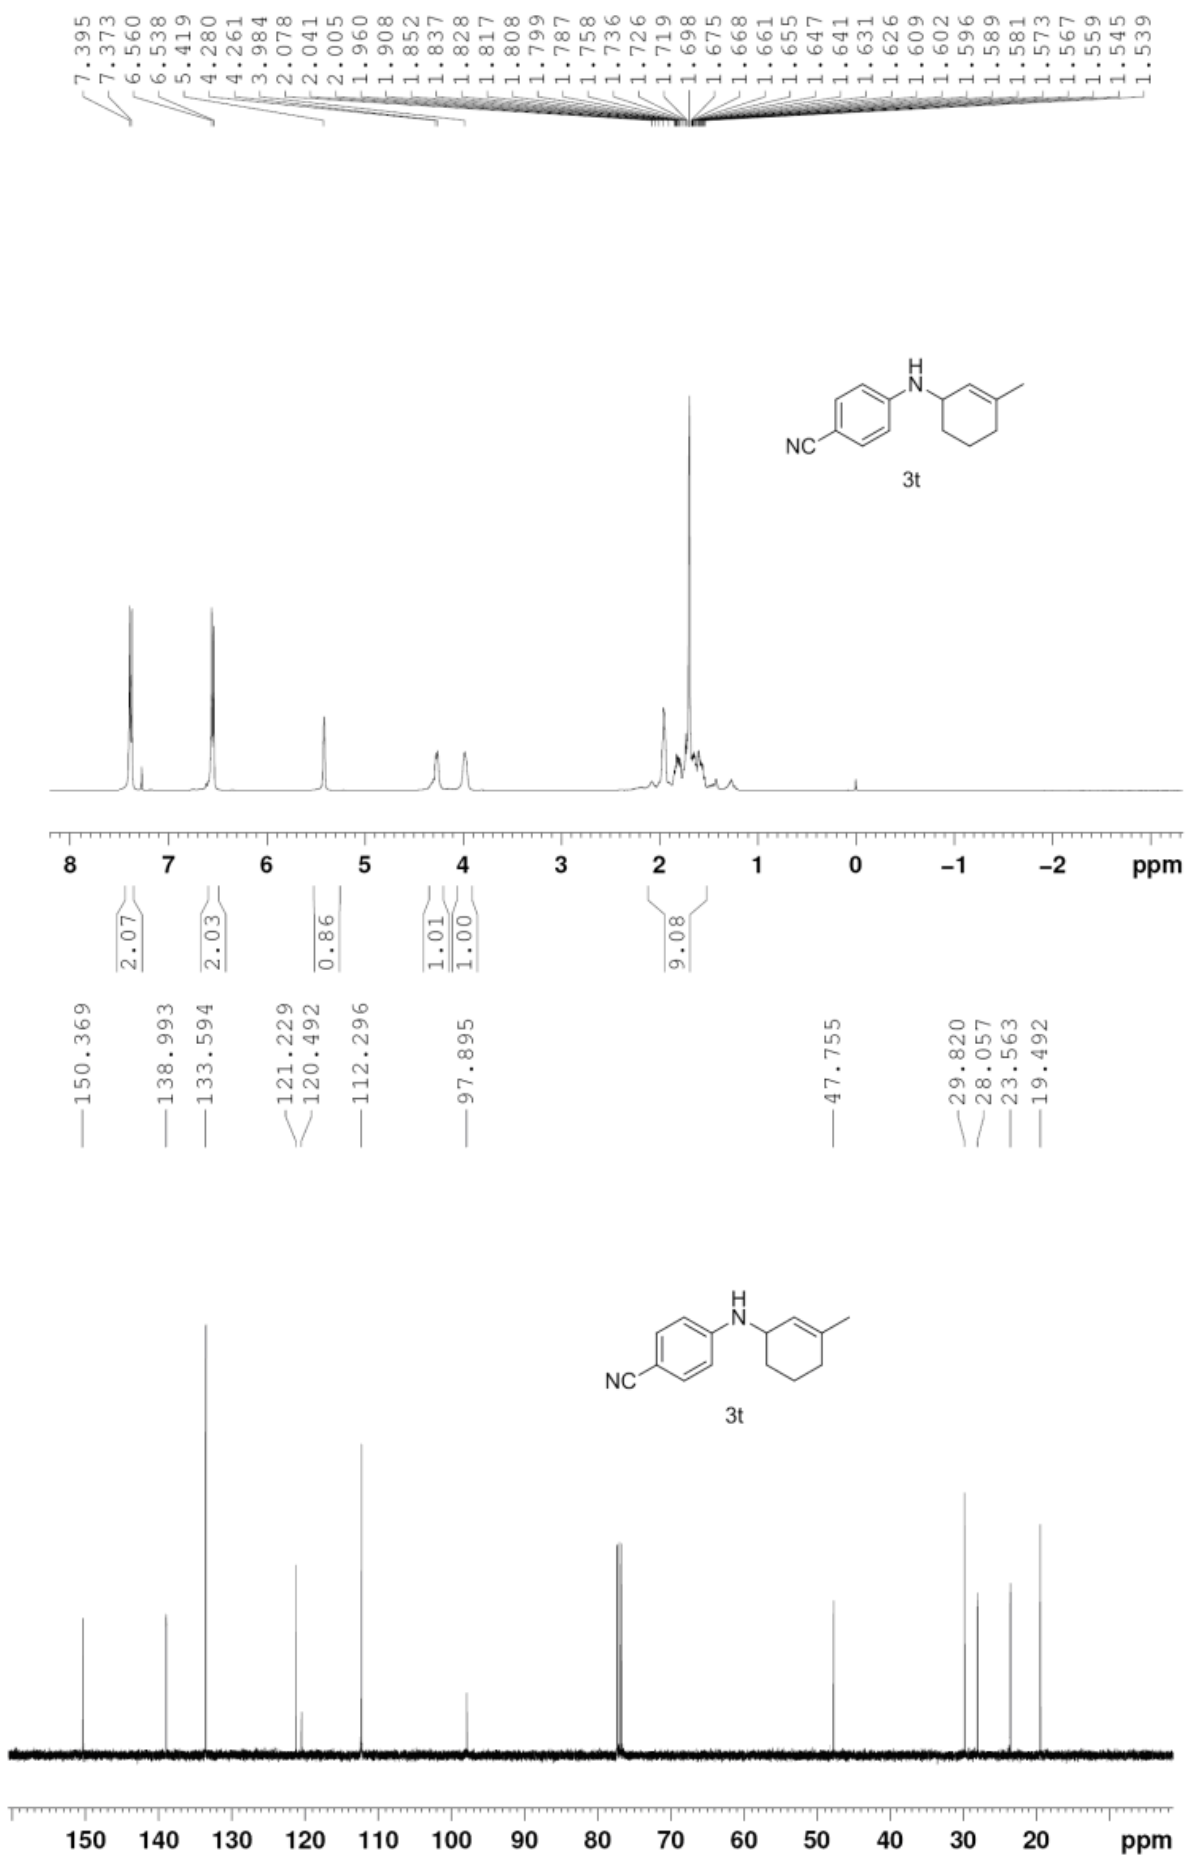



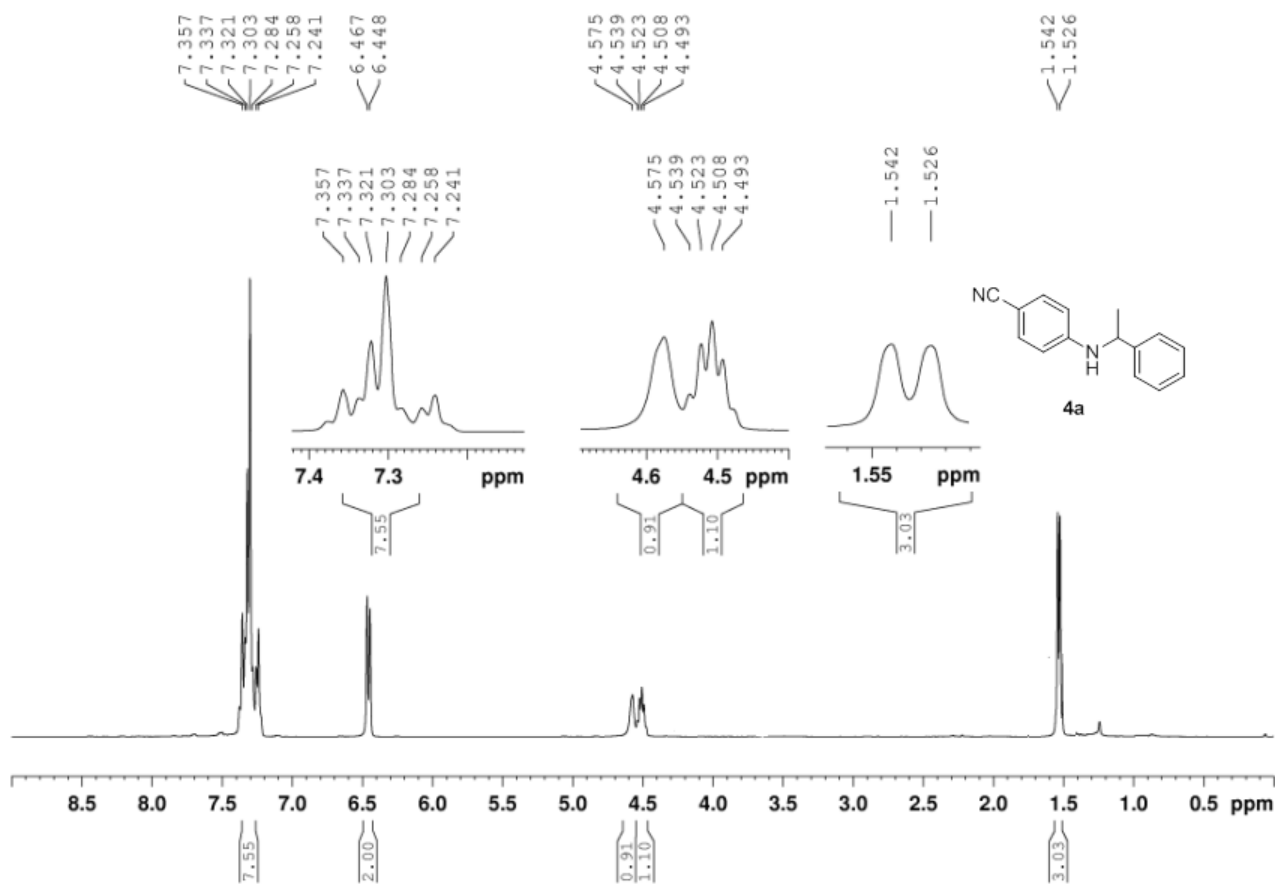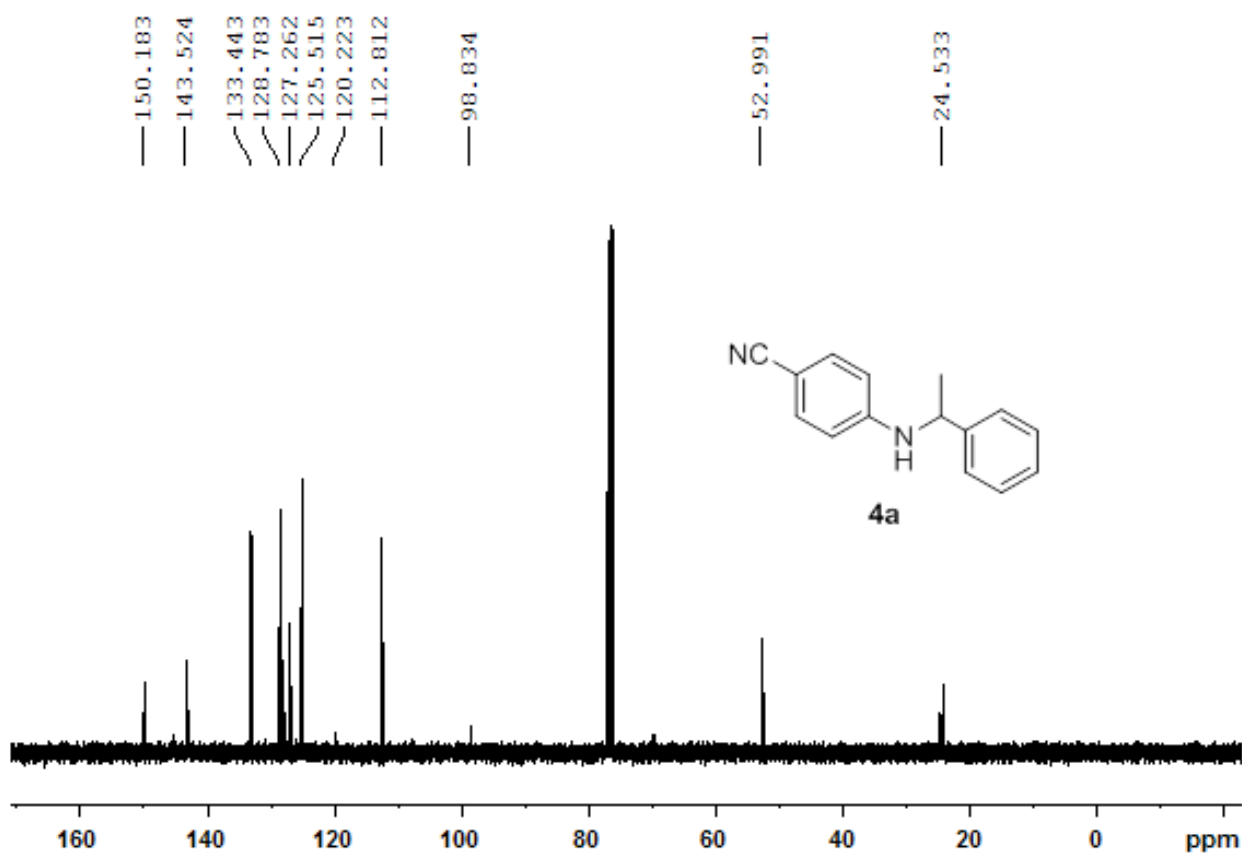

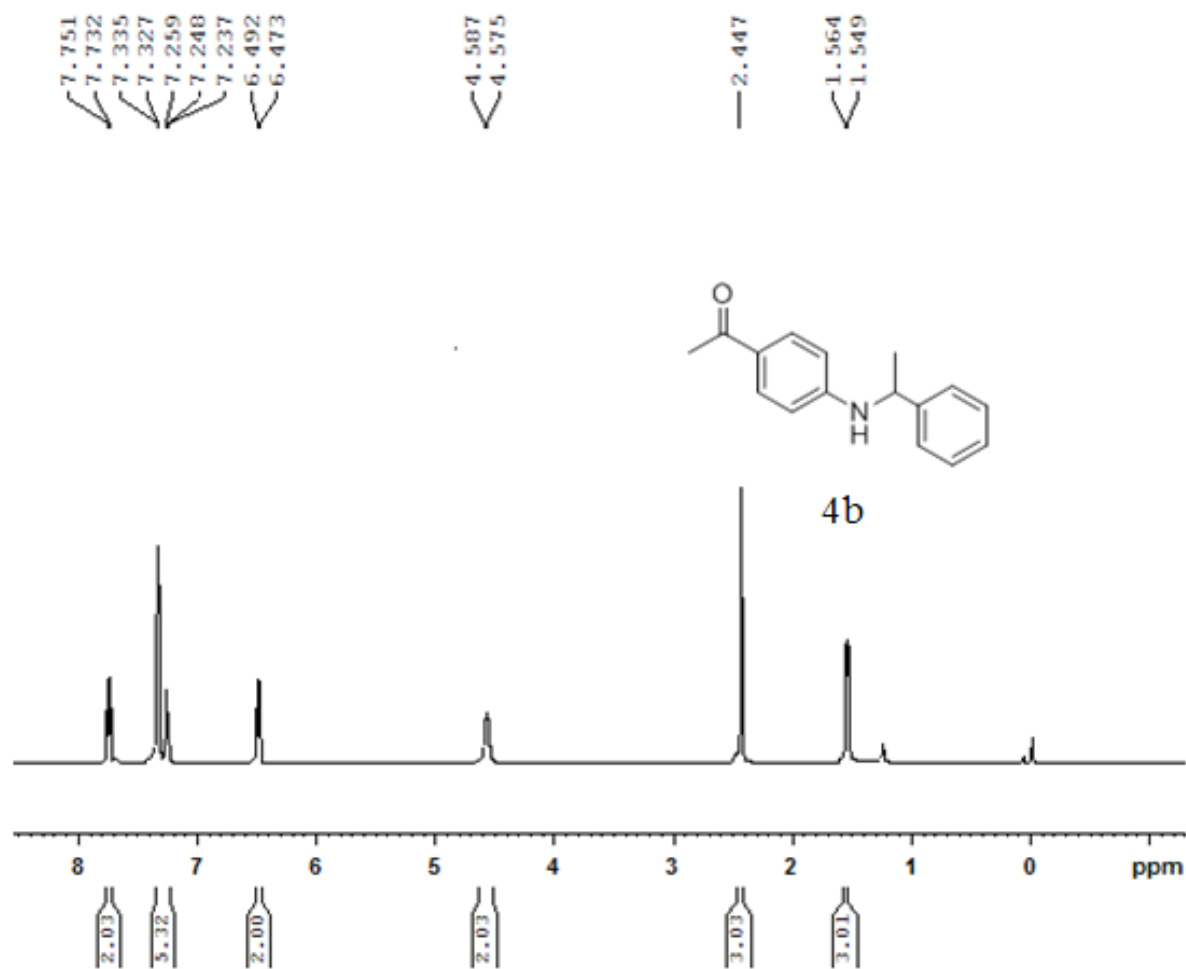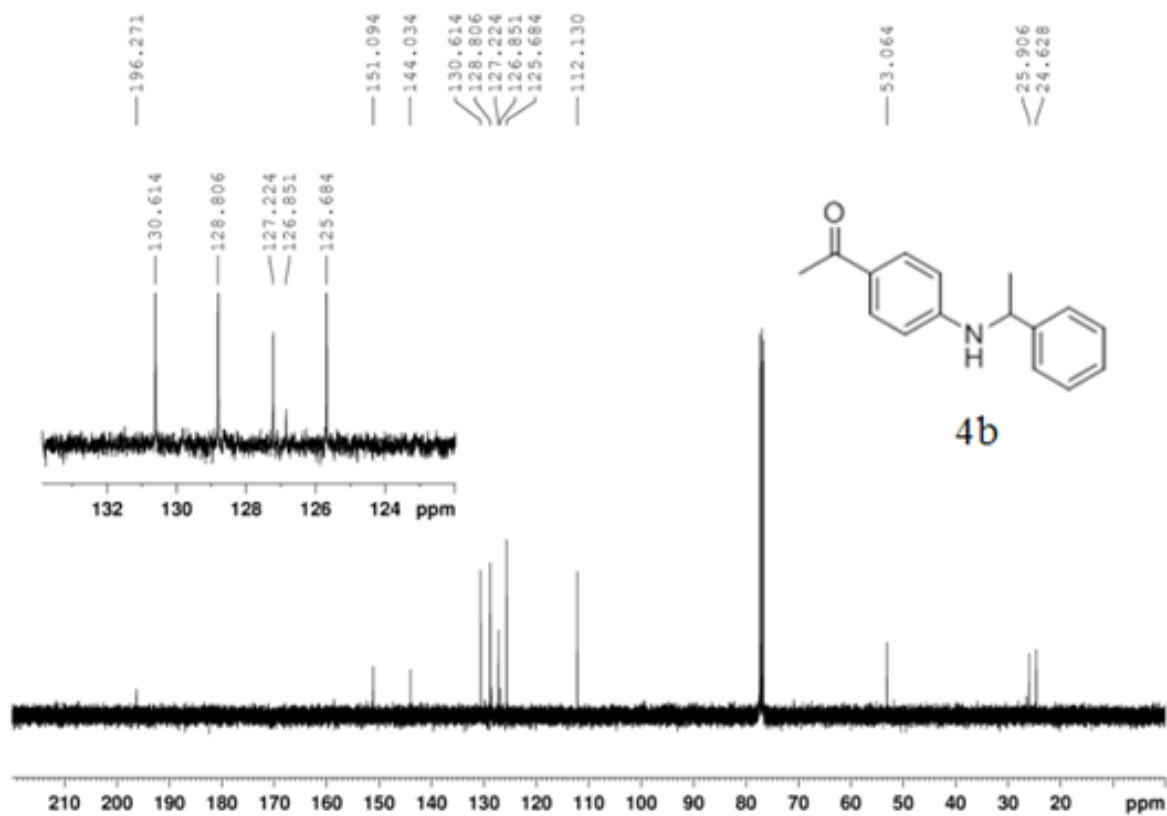

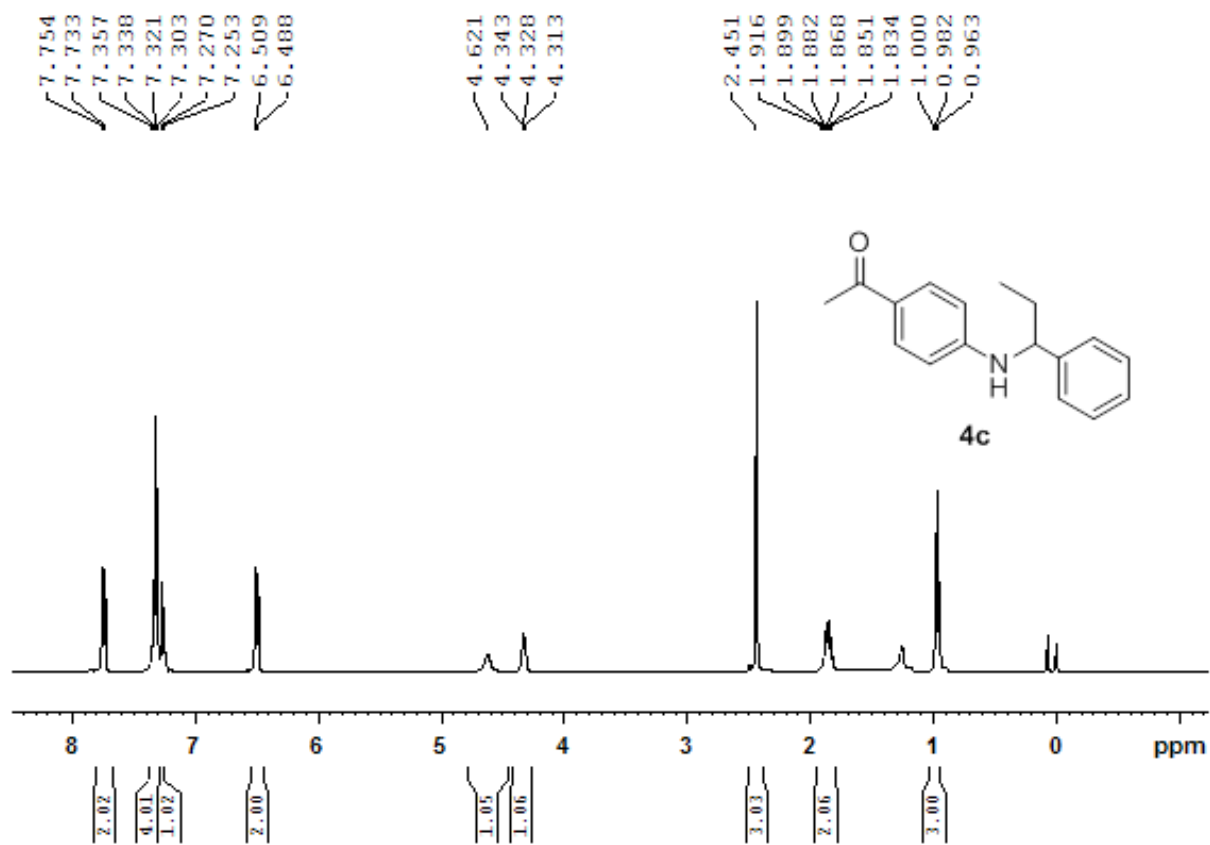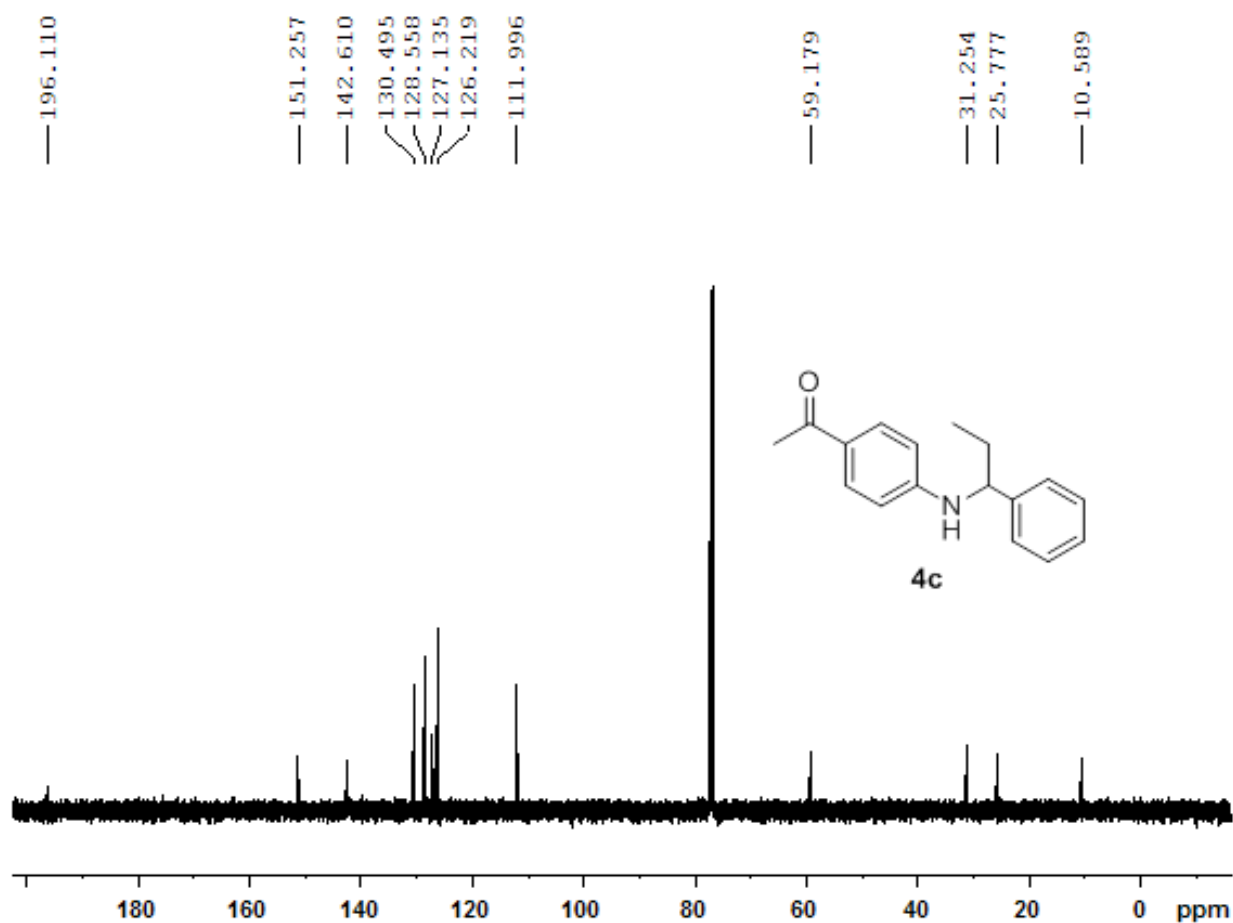

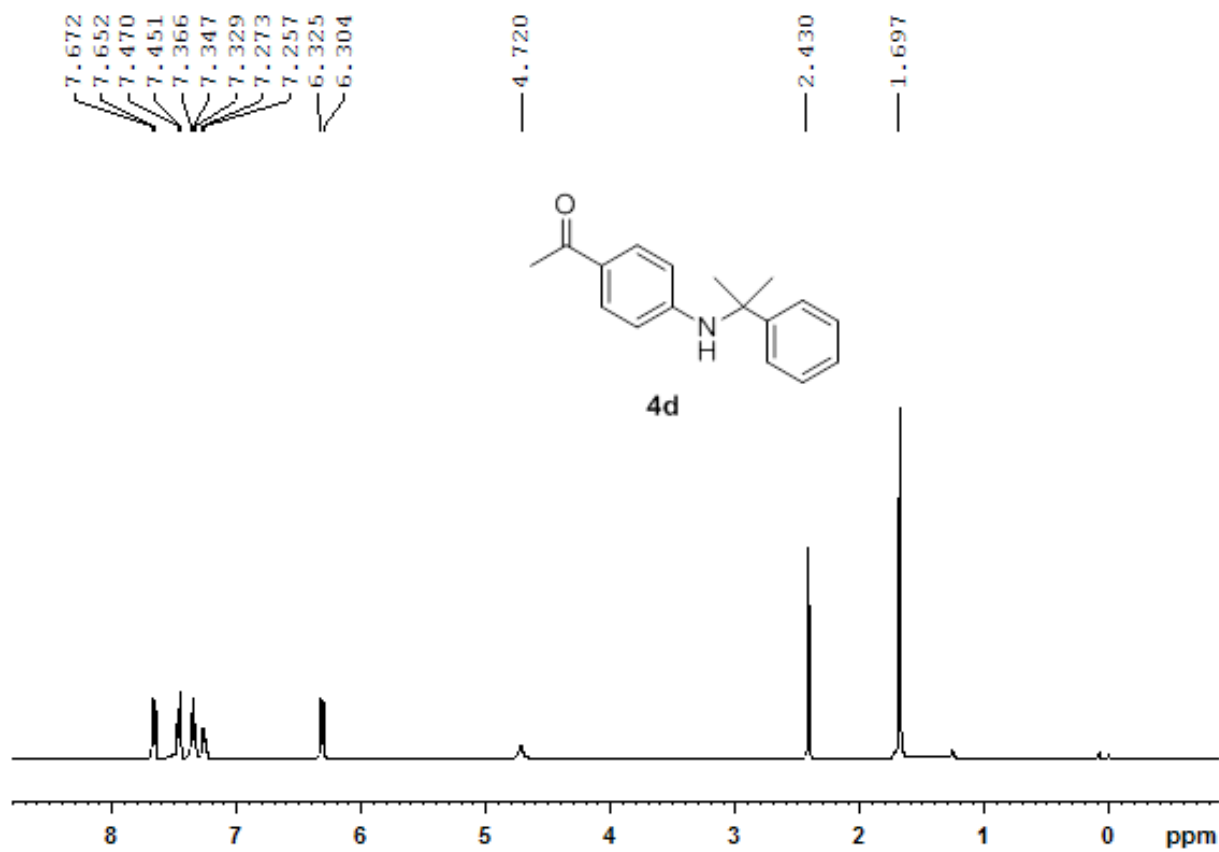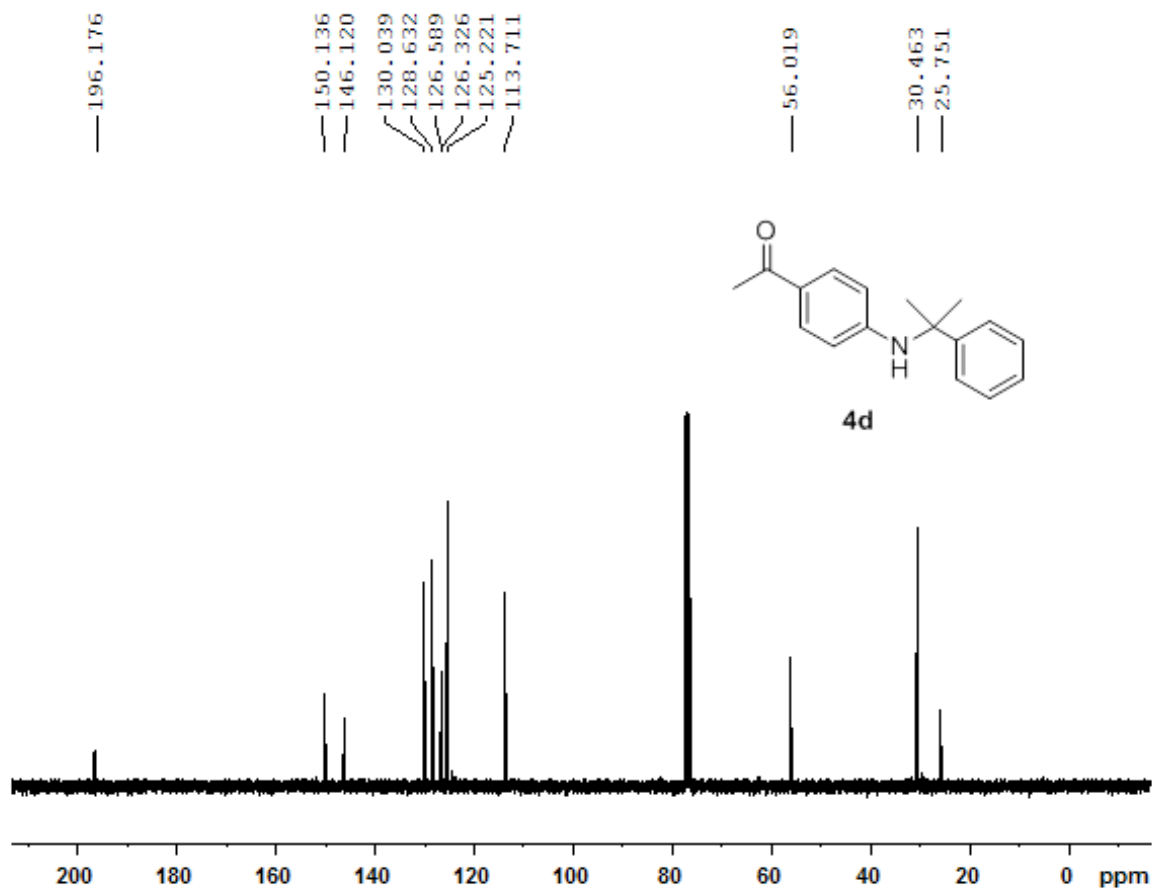

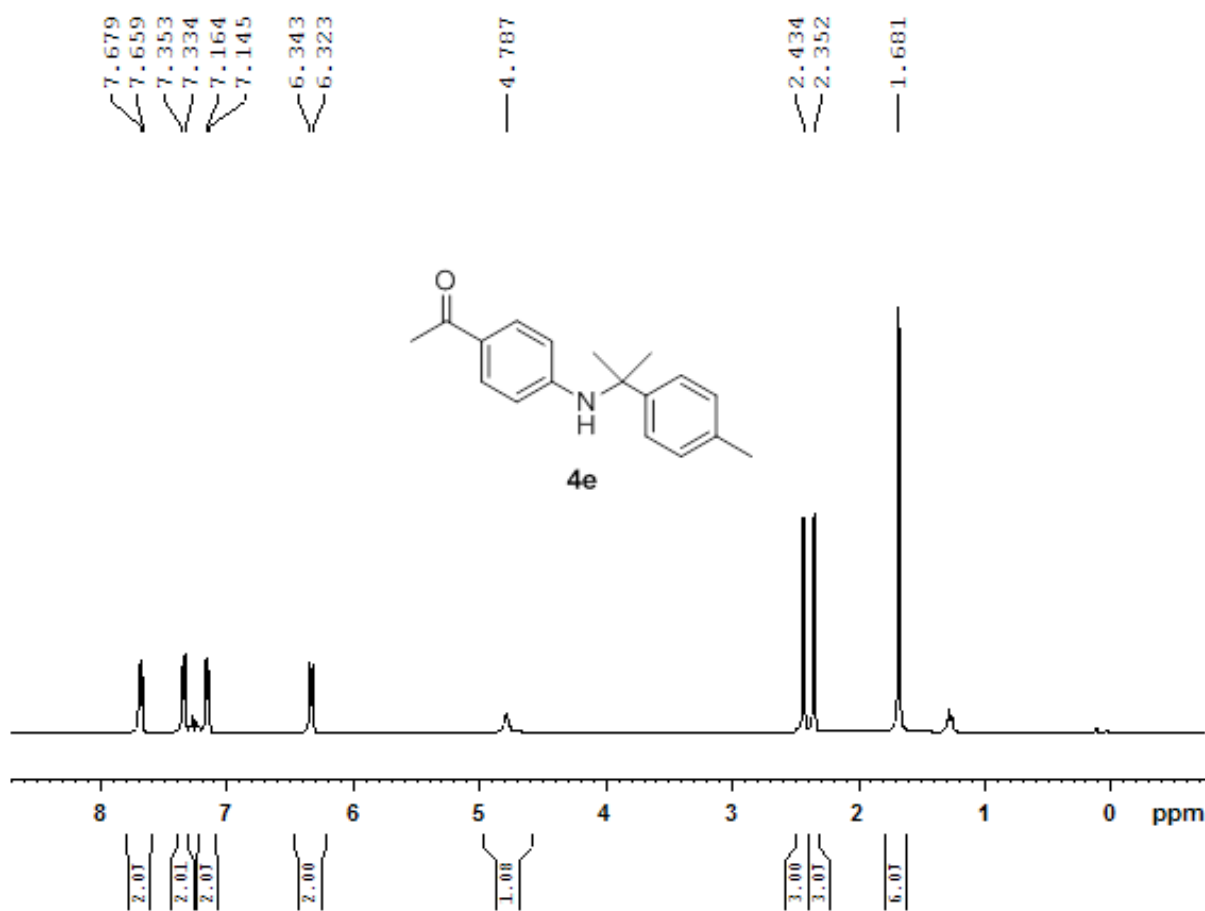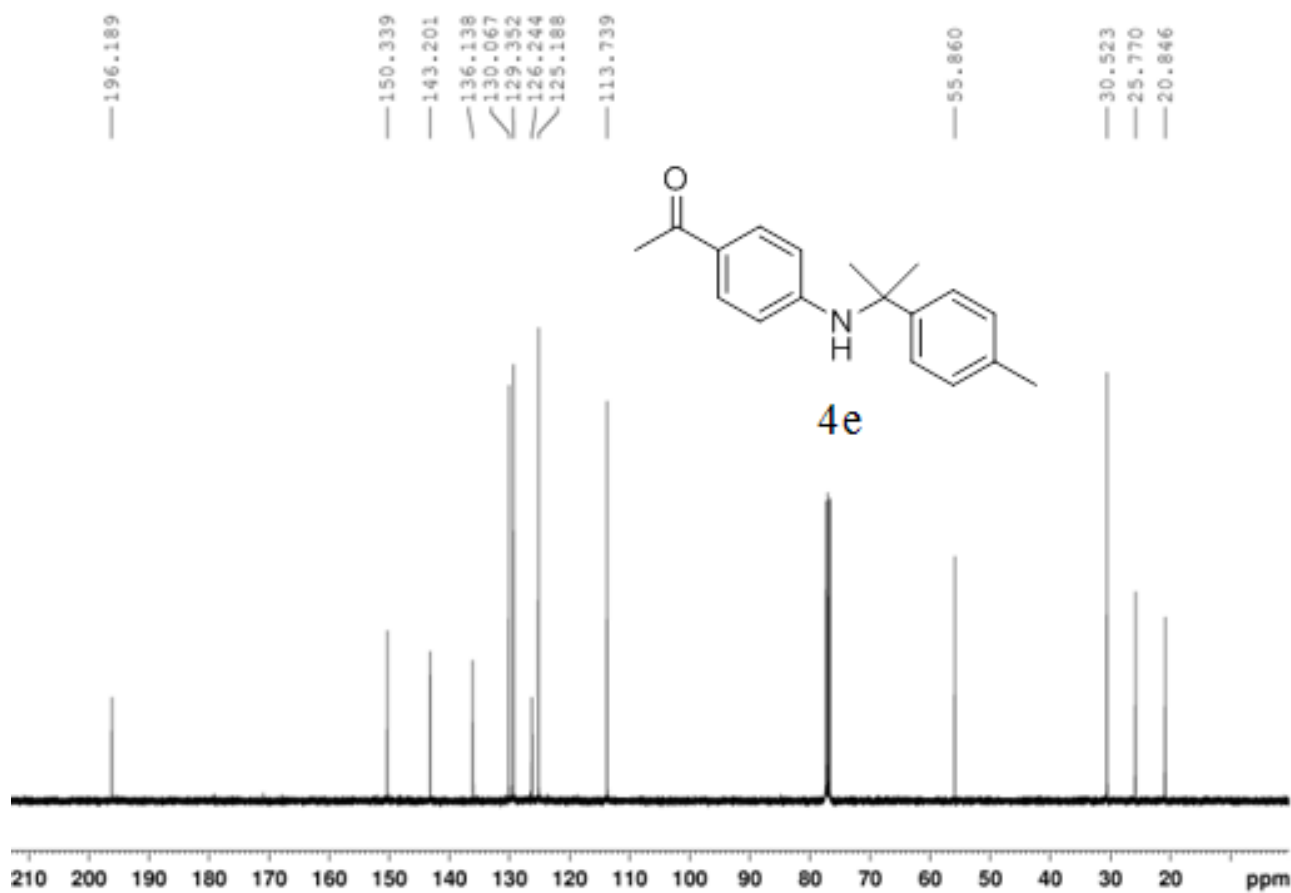

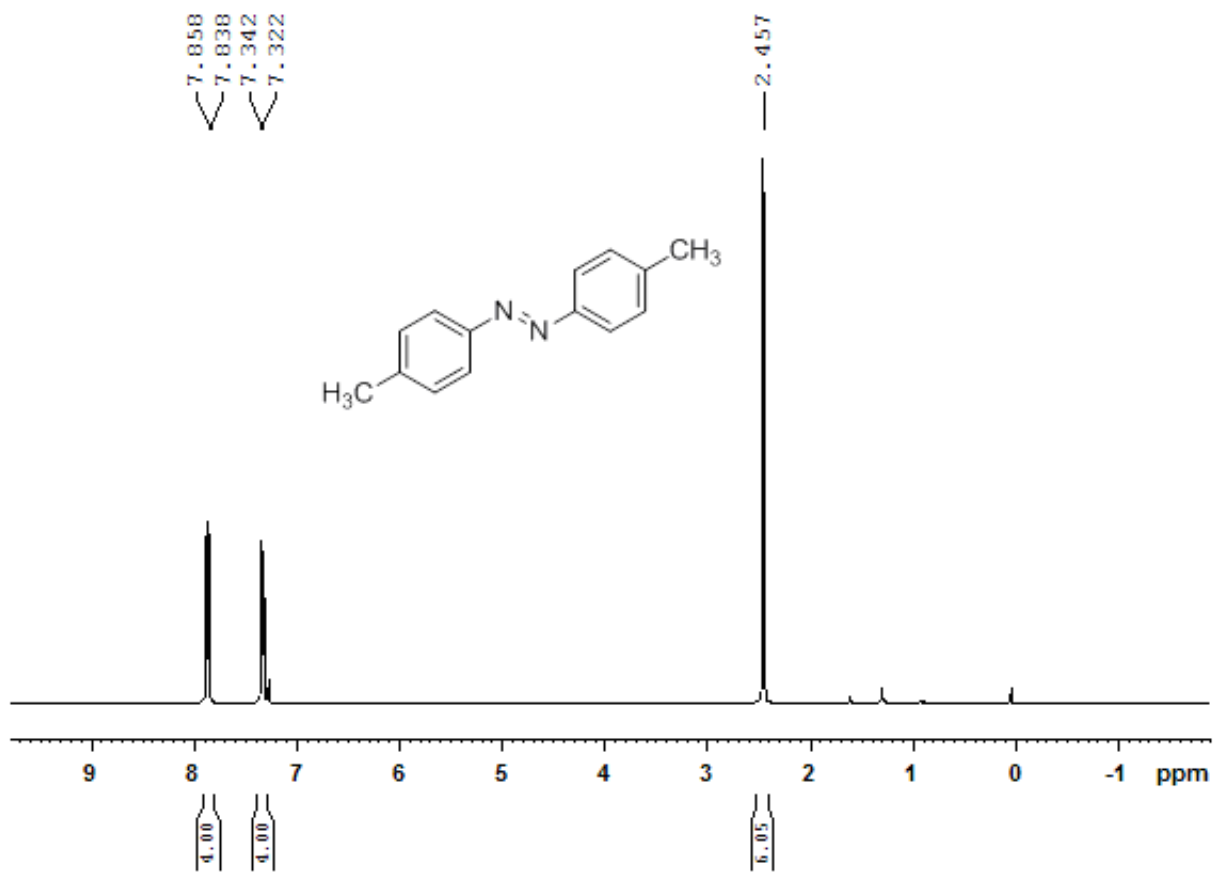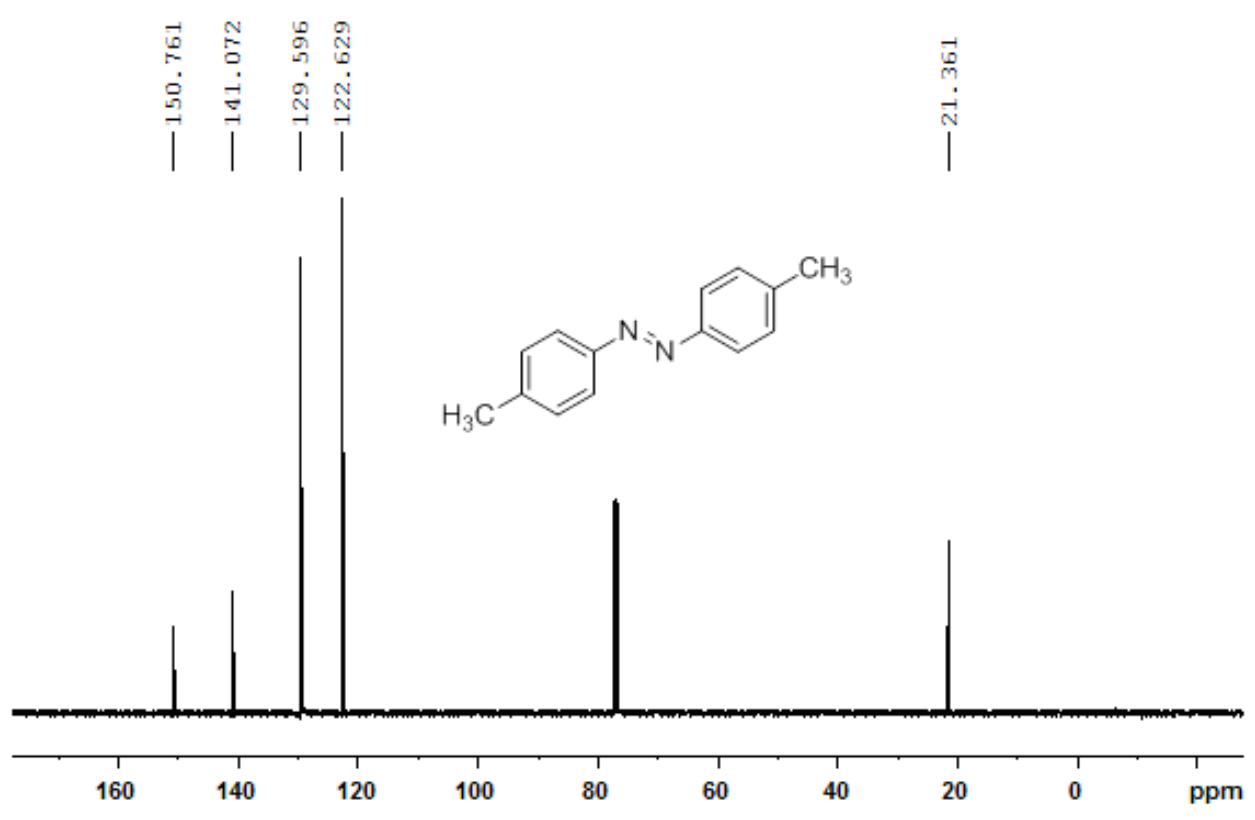

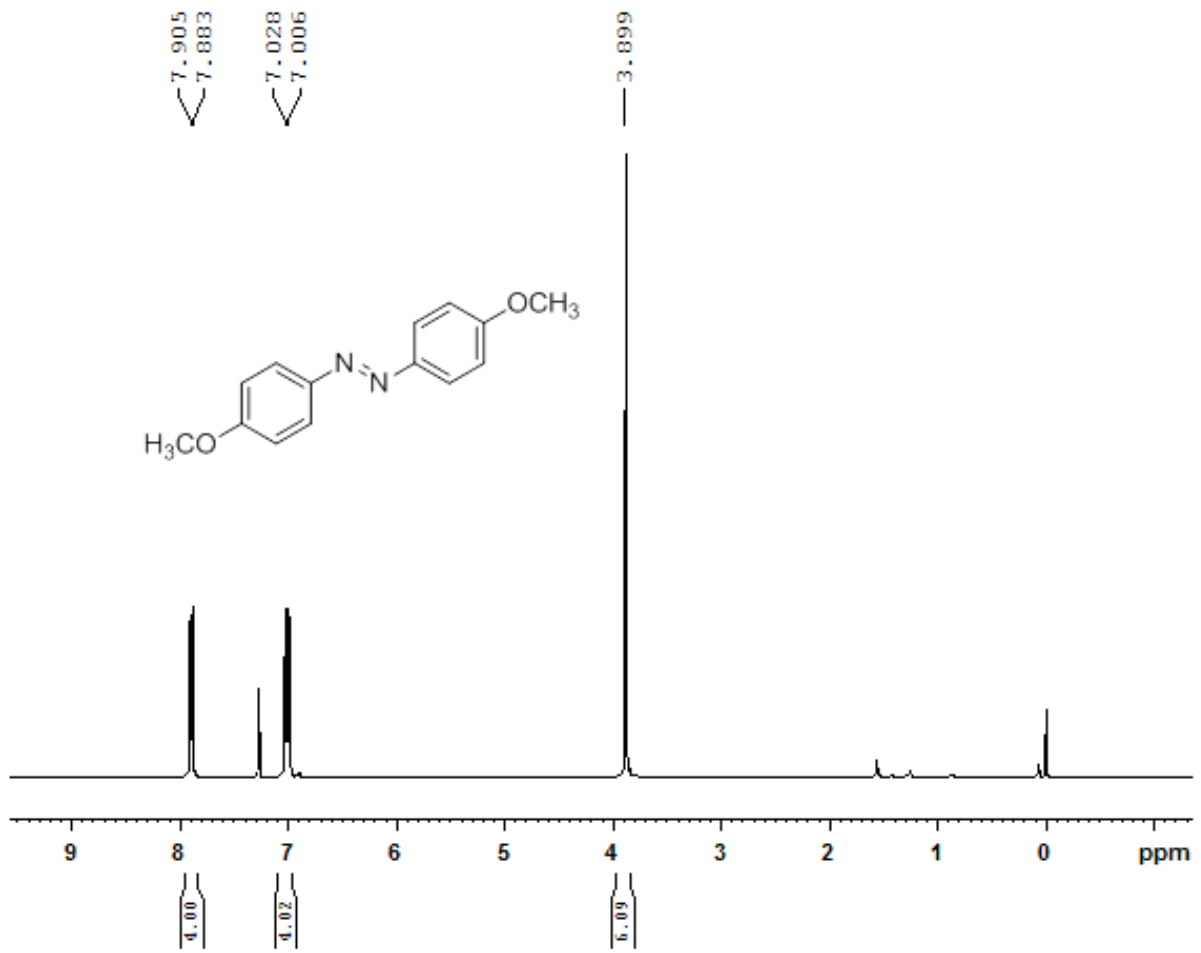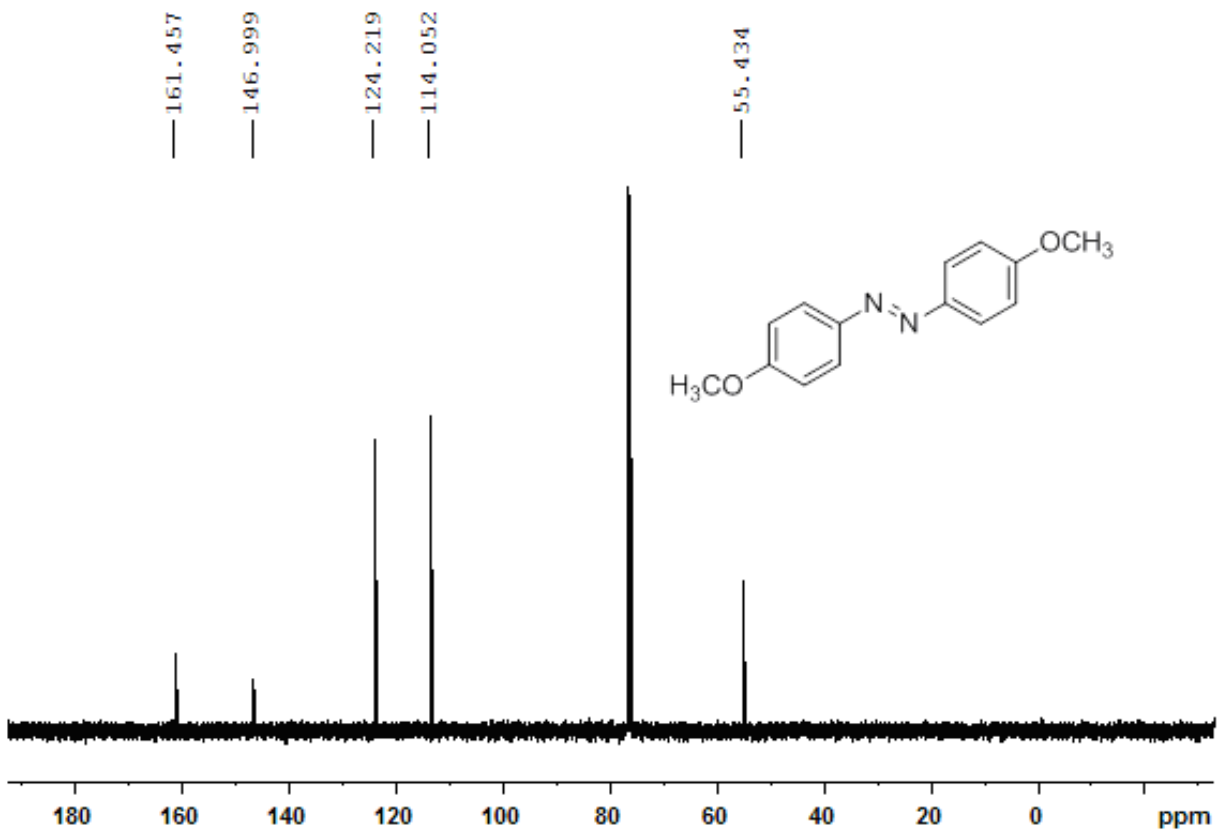

## 6. References

- [1] R. T. Gephart III, D. L. Huang, M. J. B. Aguilera, G. Schmidt, A. Shahu, T. H. Warren, *Angew. Chem. Int. Ed.* **2012**, *51*, 6488–6492.
- [2] H.-F. Ip, Y.-M. So, H. H. Y. Sung, I. D. Williams, W.-H. Leung, *Organometallics* **2012**, *31*, 7020–7023.
- [3] Z. He, R. Zhang, M. Hu, L. Li, C. Ni, J. Hu, *Chem. Sci.* **2013**, *4*, 3478–3483.
- [4] D. Intriери, A. Caselli, F. Ragaini, P. Macchi, N. Casati, E. Gallo, *Eur. J. Inorg. Chem.* **2012**, 569–580.
- [5] A. Caselli, E. Gallo, S. Fantauzzi, S. Morlacchi, F. Ragaini, S. Cenini, *Eur. J. Inorg. Chem.* **2008**, 3009–3019.
- [6] A. M. Johns, M. Utsunomiya, C. D. Incarvito, J. F. Hartwig, *J. Am. Chem. Soc.* **2006**, *128*, 1828–1839.
- [7] Y. Takeda, S. Okumura, S. Minakata, *Angew. Chem. Int. Ed.* **2012**, *51*, 7804–7808.
